## **Nervous System and Tissue Polarity Dynamically Adapt to New Morphologies in Planaria**

Johanna Bischof, Margot E. Day, Kelsie A. Miller, Joshua LaPalme, and Michael Levin\*

Allen Discovery Center at Tufts University

\* Author for correspondence:

Email: [michael.levin@tufts.edu](mailto:michael.levin@tufts.edu)

200 Boston Ave., Suite 4600

Medford, MA, 01915

**Keywords:** Polarity, Neural polarity, Cilia, PCP, Planaria, repatterning, axial

**Running title:** Tissue polarity adapts to double-headed morphology

1 **Abstract**

2           The coordination of tissue-level polarity with organism-level polarity is crucial in development,  
3 disease, and regeneration. Exploiting the flexibility of the body plan in regenerating planarians, we used  
4 mirror duplication of the primary axis to show how established tissue-level polarity adapts to new  
5 organism-level polarity. Tracking of cilia-driven flow to characterize planar cell polarity of the epithelium  
6 revealed a remarkable reorientation of tissue polarity in double-headed planarians. This reorientation is  
7 driven by signals produced by the intact brain and is not hampered by radiation-induced removal of stem  
8 cells. The nervous system itself adapts its polarity to match the new organismal anatomy in these animals  
9 as revealed by distinct regenerative outcomes driven by polarized nerve transport. Thus, signals from the  
10 central nervous system can dynamically control and re-orient tissue-level polarity to match the organism-  
11 level anatomical configuration, illustrating a novel role of the nervous system in the regulation of  
12 patterning.

13

14

## 15 Introduction

16 A fundamental question in biology is how spatial patterns are coordinated during dynamic  
17 regulation of growth and form. In order to control regeneration, where organisms must repair complex  
18 tissues from different starting configurations, it is critical to understand the interaction of patterns across  
19 scales, from an individual cell's cytoskeletal structure to body-wide axial orientation. We used the robust  
20 morphogenetic process of regeneration to ask how cell- and tissue-level order is functionally linked to  
21 organism-level axial organization. This question is of fundamental biological interest and is also of  
22 significant relevance to bioengineering and regenerative medicine, which seek to apply cell-level signals  
23 in order to achieve large-scale anatomical outcomes.

24 Regeneration is a biological process that enables organ remodeling and repair in a number of  
25 organisms, most prominent among them planarian flatworms with their ubiquitous ability to regenerate  
26 all tissues in their body. While the regenerative process in planarians is well described (Reddien, 2018),  
27 we address here two key knowledge gaps. First, it is not known how directional and positional  
28 informational cues interact during regeneration – specifically, how tissue-level polarity adapts to changes  
29 in organism-level polarity. Second, repatterning and other responses to damage on long timescales have  
30 received comparatively little attention; here, we characterize such long-term changes and explore the  
31 mechanisms that drive them.

32 In addition to forming new structures, planarian regeneration requires that the remaining tissues  
33 adjust to their new position in the organism in a process termed repatterning (Adell, Cebria, & Salo, 2010;  
34 Morgan, 1901; Reddien & Sanchez Alvarado, 2004). In normal planarian regeneration, this repatterning  
35 involves the appropriate scaling of pre-existing organs to the animal's new size, re-establishment of the  
36 correct length/width ratio of the animal, and adaptations of expression patterns of positional control  
37 genes (PCGs) as tissues adapt to their new position within the organism (Witchley, Mayer, Wagner, Owen,  
38 & Reddien, 2013). The repatterning is more apparent in animals induced to regenerate with atypical  
39 morphologies, such as double-headed planarians (Durant et al., 2017; Oviedo et al., 2010) where large  
40 sections of tissue in the original posterior of the animal undergo an anteriorization process, including the  
41 duplication of structures such as the pharynx.

42 The flexibility of the planarian body plan enables investigation of the response of existing tissues  
43 to new signaling environments via the induction of double-headed animals with mirror-image duplication  
44 of the anterior-posterior axis from fully formed single-headed animals, which is not possible in other  
45 systems used to study tissue polarity, such as *Drosophila* wings and *Xenopus* embryos (Devenport, 2014;  
46 Werner & Mitchell, 2012b). Planar cell polarity (PCP) signaling is one of the highly conserved pathways  
47 that underlie tissue polarity in distantly related animals (Davey & Moens, 2017; Devenport, 2014; Marshall  
48 & Kintner, 2008; Wallingford, 2012). PCP signaling plays a key role in establishing and maintaining polarity  
49 in tissues, for example in the setting of polarity in multiciliated epithelia (Brooks & Wallingford, 2014;  
50 Meunier & Azimzadeh, 2016; Spassky & Meunier, 2017) and cancer suppression (Lee & Vasioukhin, 2008).  
51 Alternative mechanisms for setting polarity are also widespread, such as the morphogen gradients driving  
52 blastoderm polarization in *Drosophila* embryos.

53 PCP signaling determines the polarity of many tissue structures, among them multiciliated  
54 epithelia. Cilia are microtubule-based structures that grow out of basal bodies attached to the cell  
55 membrane and which, through a dynein motor driven process perform a beating motion. The orientation  
56 in which the basal body is attached determines the beat direction of the cilium (Y.-H. Chien et al., 2013).

57 The establishment of ciliary polarity, via the orientation of the basal bodies, relies on both molecular  
58 signals from PCP transmitted via the cytoskeleton (Kunimoto et al., 2012; Wallingford, 2010; Werner et  
59 al., 2011; Werner & Mitchell, 2012a), as well as hydrodynamic cues (Y. H. Chien, Srinivasan, Keller, &  
60 Kintner, 2018; Mitchell, Jacobs, Li, Chien, & Kintner, 2007). While cilia in single-celled organisms can  
61 reverse their beat directions (Iwadate & Suzaki, 2004; Noguchi, Kitani, Ogawa, Inoue, & Kamachi, 2005),  
62 there have not been any reports of cilia in multiciliated epithelia cells changing their beat direction after  
63 it has been established during development. Ciliary function is thus a sensitive and convenient readout of  
64 the underlying epithelial planar organization.

65 Multiciliated epithelia fulfill many physiological functions (Spassky & Meunier, 2017), including  
66 the clearing of mucus in the airway (Konishi et al., 2016), the movement of cerebrospinal fluid in the brain  
67 ventricles (Ohata & Alvarez-Buylla, 2016), and motility in the larval forms of many marine animals  
68 (Veraszto et al., 2017). In planarians, the multiciliated epithelium on the ventral surface is responsible for  
69 the main mode of movement of the worm, allowing smooth gliding (Azimzadeh & Basquin, 2016;  
70 Azimzadeh, Wong, Downhour, Sanchez Alvarado, & Marshall, 2012; Rompolas, Azimzadeh, Marshall, &  
71 King, 2013; Rompolas, Patel-King, & King, 2010; Rustia, 1925). Classical observational data (Pearl, 1903;  
72 Rustia, 1925), as well as modern molecular and theoretical exploration (Vu et al., 2018), showed that in  
73 planarians with abnormal morphologies, such as in double-headed or double-tailed animals, cilia polarity  
74 is aligned with the polarity of the new body plan via PCP signaling. However, the mechanism by which  
75 new morphologies are translated into effects on polarity remains unknown.

76 The well-described link between PCP signaling and neural development (Goodrich, 2008; Tissir &  
77 Goffinet, 2010), and our recent work revealing a dependence on nerve transport for the formation of new  
78 body plans in planarians (Pietak, Bischof, LaPalme, Morokuma, & Levin, 2019), led us to investigate how  
79 the polarity of the nervous system is affected by atypical body morphologies and how signals from the  
80 nervous system impact cilia orientation. Here, we uncover and characterize the remarkable remodeling  
81 of the ventral multiciliated epithelium in double-headed planarians, during which cilia beat orientation  
82 across large tissue sections is progressively changed, without relying on cell turnover. This reorientation  
83 of the epithelial polarity depends on signals from an intact brain. Alongside this repatterning of the  
84 multiciliated epithelium, we observed that the overall nervous system polarity is reoriented progressively  
85 towards the midpoint of the animal. These results reveal how nervous system structure and tissue planar  
86 polarity interact so that pre-existing tissues can be remodeled to accommodate a drastically different  
87 body architecture and shed light on the dynamic relationship between directional tissue-level patterning  
88 and positional organ pattern on the scale of the entire body.

## 89 Results

### 90 *Ciliary beat orientation reveals progressive adaptation to new organismal polarity*

91 Double-headed (DH, mirrored axial polarity) planarians can be created via a variety of methods,  
92 including manipulation of bioelectric signaling (Durant et al., 2017; Oviedo et al., 2010) or interference  
93 with the Wnt signaling pathway (C. P. Petersen & Reddien, 2008). Newly regenerated DHs (7 days after  
94 transection of the single-headed animal) of the species *Dugesia japonica* show developmental differences  
95 between their two heads: the head regenerated from the anterior blastema is more fully regenerated  
96 than the head positioned on the original tail end of the animal, based on criteria such as eye development,  
97 head shape, and blastema coloration (Figure 1A i-iii). We refer to the anterior blastema-derived head as  
98 the primary head, while the posterior blastema-derived head is termed the secondary head. The primary  
99 head dominates the body movement (Video 1). The morphological differences between the two heads  
100 reduce over two to three weeks, eventually leading to both sides being equal in appearance and having  
101 equal control over the body movement after about one month (Figure 1Aiv-vi, Video 2). The growth of a  
102 secondary head represents an enormous deviation in organismal polarity, and the length of time required  
103 to repattern the tissue adjacent to the secondary head provides a unique opportunity to assess the long-  
104 term processes that guide remodeling and coordinate axial organ positioning with tissue properties.

105 The difference in movement patterns between DHs at Day 7 and Day 49 led us to investigate the  
106 underlying changes in the multiciliated ventral epithelium, the tissue that drives movement in planarians  
107 (Figure 1B) (Azimzadeh et al., 2012; King & Patel-King, 2016; Rompolas et al., 2013). Since cilia beat  
108 orientation in multiciliated epithelia serves as a convenient and reliable read-out of underlying tissue  
109 polarity (Wallingford, 2010), we adapted an assay to visualize cilia beat orientation in living animals (Pietak  
110 et al., 2019; Rustia, 1925). In this assay, worms were placed ventral side up, attached to the underside of  
111 the water surface, carmine powder was sprinkled on top of the water, and movement of the powder was  
112 observed (Figure 1C, Video 3). Known disruptions of cilia beat function, such as reduction of temperature  
113 or 3% ethanol treatment (Stevenson & Beane, 2010), showed immediate cessation or significant reduction  
114 of flow, validating our assay (Figure S1). In normal single-headed worms, we observed a complete  
115 concordance between the polarity of the epithelium as detected by tracked powder flow and the antero-  
116 posterior axial patterning (Figure 1C).

117 We then tracked the cilia-driven flow in DH animals, which exhibited a clear mirroring of the ciliary  
118 polarity, as previously described (Rustia, 1925; Vu et al., 2018). Due to the opposing beat direction in DH  
119 animals, the powder used to visualize the flow accumulated at a point along the animal's body (Figure  
120 1D). We termed this point the "collision zone", which marks the symmetry point of the ciliated epithelium  
121 in the animal. Interestingly we observed that in DHs at 7 days after cutting, the collision zone is located at  
122 the base of the secondary head (Figure 1D, Video 4). However, over time, the collision zone progressively  
123 shifts along the length of the animal until it reaches the midpoint around 42 days after cutting (Figure 1D,  
124 Video 4). This process is highly conserved across all DHs (Figure 1E). The repatterning progresses at a  
125 relatively consistent speed from Day 7 to Day 35, before slowing down between Day 35 and Day 42 and  
126 stalling following Day 42 (Figure S2A). Repatterning progresses at the same relative speed in animals of  
127 different sizes (Figure S2B), suggesting that the repatterning rate is scaling with the size of the animal.  
128 Thus, we discovered that the middle of DH worms dynamically adapts its planar polarity over multiple  
129 weeks to match the new axial body plan (Figure 1F).

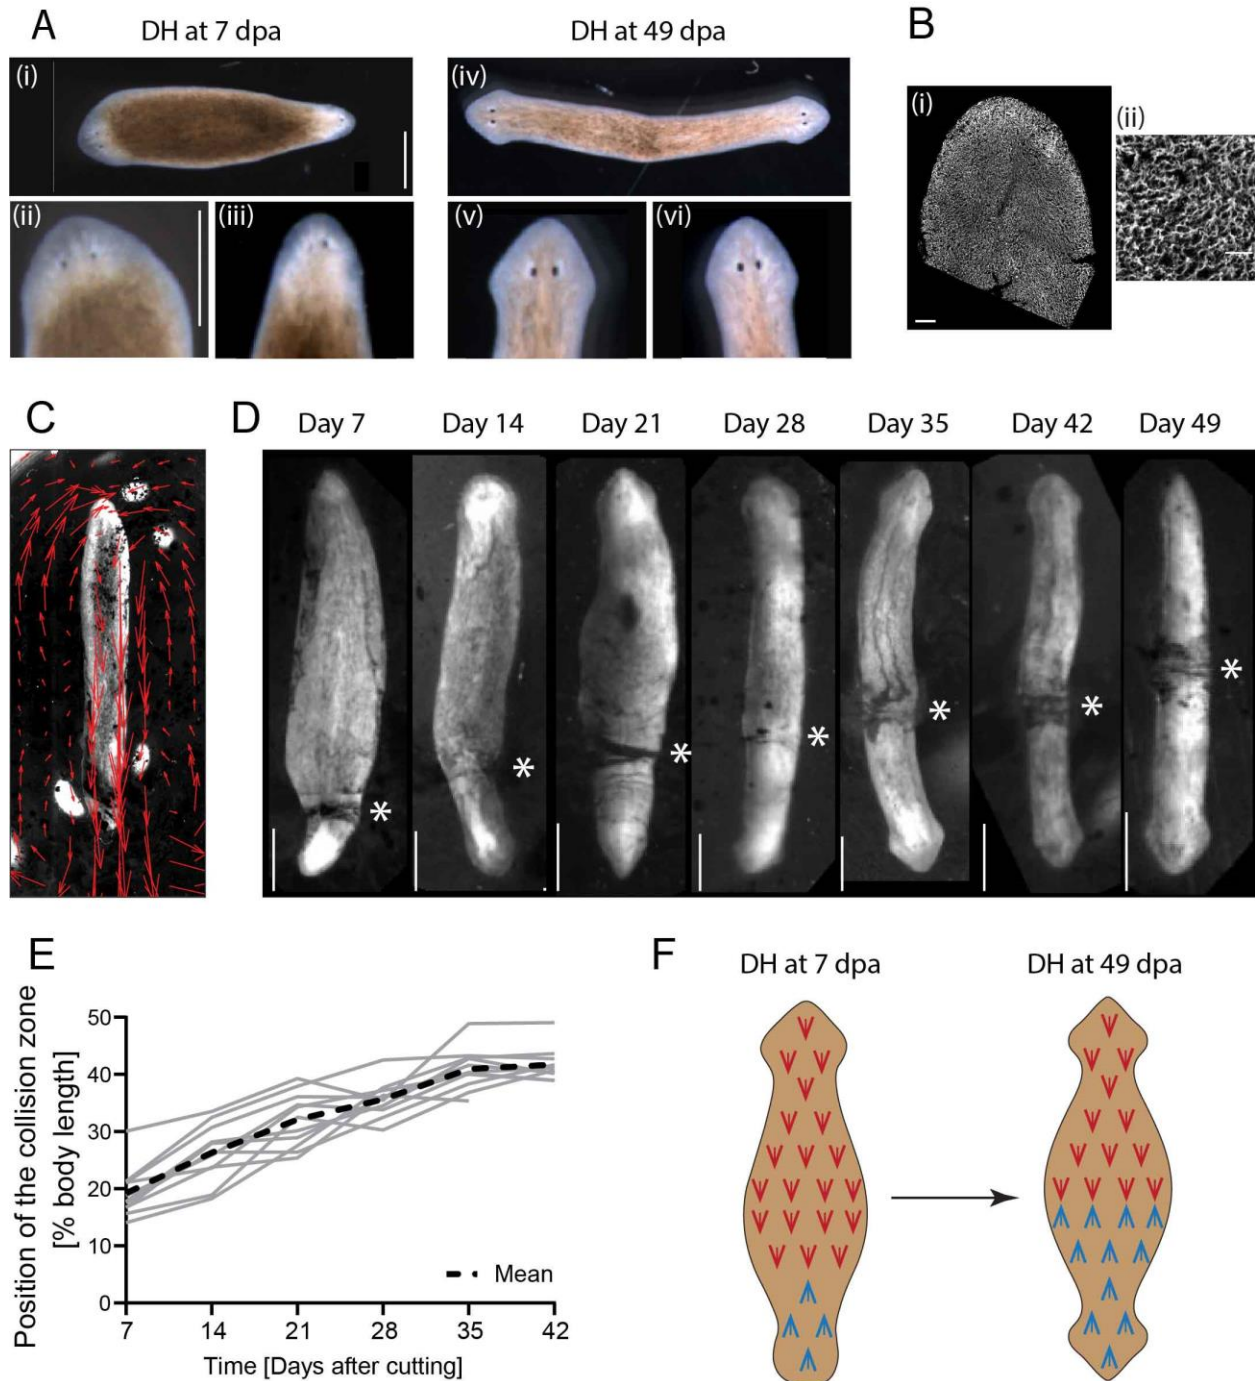

130

131 **Figure 1: Flow driven by the multiciliated epithelium can be tracked and epithelial polarity dynamically remodels**  
 132 **in DH animals.** A) (i) Morphological differences in head development in DHs can be observed at Day 7 (days after  
 133 amputation – dpa), revealing that the primary head (ii) is more developed than the secondary head (iii). (iv) In DHs  
 134 at Day 49 both heads (v, vi) are equally developed. Scale bars 1 mm. B) Cilia of the multiciliated ventral surface  
 135 epithelium stained with antibody against acetylated-tubulin at (i) low and (ii) high magnification. Scale bar 100 μm  
 136 in (i) and 25 μm in (ii). C) Flow driven by cilia beat can be visualized with carmine powder and tracked with particle  
 137 image velocimetry (PIV) in a single-headed animal (red arrows). D) Opposing flow directions in DH animals lead to  
 138 the accumulation of particles at the point where the opposing flow fields meet. This “collision zone” (asterisk)  
 139 repositions towards the middle of the animal from Day 7 until Day 49. E) Plot of position of the collision zone as

140 percentage of total body length for 12 animals individually tracked over time, measured every 7<sup>th</sup> day, and mean  
141 curve (dashed line). N=12, with 5 repeats showing similar pattern. F) Schematic representing the change in cilia  
142 orientation in the posterior half of the DH as the cilia orientation changes over time.

143

#### 144 *The signal driving repatterning propagates slowly across the body*

145 The strikingly long repatterning time frame poses the question of whether the repatterning signal  
146 is slowly distributed across the animal, or whether the cells of the epidermis require time to adapt to a  
147 signal that is present throughout the body at the time of organismal repatterning. To address this, we cut  
148 out tissue from the middle of the animal at Day 7 (Figure 2A) to force the formation of new ciliated  
149 epidermis in the middle of the body while the body is actively repatterning. If the information is already  
150 present throughout the animal, the newly regenerated cells could be expected to regenerate with the  
151 correct orientation in place, leading to a faster repatterning or irregular flow pattern in DHs with internal  
152 tissue removal. This was not the case. We observed no difference between control animals and DHs with  
153 internal tissue removal in both repatterning speed (Figure 2A, Supplementary Table 1) and collision  
154 zone/flow pattern (Video 5). This suggests that the signal responsible for the correct pattern is transmitted  
155 slowly across the worm rather than epithelial cells slowly adapting to already present information.

156 However, observations in another organ system suggest that this process of slowly transmitted  
157 repatterning information across the newly formed double-headed animal is not universal. *De novo*  
158 pharynx formation, which is assumed to rely on position control genes (PCG) for its positing (Adler, Seidel,  
159 McKinney, & Sanchez Alvarado, 2014), can be observed in DH animals between Day 7 and Day 10. These  
160 newly formed pharynges were already positioned correctly in relation to the DH body proportion and  
161 orientation. They did not shift their position significantly over time after Day 10 (Figure S3). This suggests  
162 that the signals setting the directionality of planar tissue polarity to be in concordance with the new axial  
163 morphology may not propagate at the same rate as the signals that determine pharynx positioning.

#### 164 *Repatterning of the ventral epithelium is not dependent on cell turnover*

165 To investigate whether the repatterning of the multiciliated epithelium requires the replacement  
166 of wrongly oriented cells with new, correctly oriented cells, we treated animals 7 days after DH induction  
167 (as soon as DHs had completed regeneration) with high doses of radiation (~200 Gy), which is known to  
168 kill all stem cells (neoblasts) and thereby prevent all new cell formation in planaria (Wagner, Wang, &  
169 Reddien, 2011). Complete removal of neoblasts following irradiation was confirmed by absence of  
170 staining for actively dividing cells (Figure S4), a lack of regeneration following cutting, and death around  
171 40 days after irradiation. We observed no difference in the repatterning speed of these irradiated animals  
172 compared to controls over the entire repatterning time period (Figure 2B, Supplementary Table 2);  
173 moreover, irradiated animals had collision zones positioned almost at the midpoint before they died.  
174 While some reorientation could be explained by the presence of progenitor cells at the time of irradiation,  
175 the full repatterning observed over the long time frame, strongly suggests that cilia reorientation in  
176 repatterning DHs happens via the intracellular reorientation of the pre-existing cilia rather than via the  
177 replacement of the misoriented cells and is not dependent on neoblast activity.

178

179

180 *Tissue repatterning is actin-dependent*

181 To investigate how the reorientation of cilia occurs in existing cells, we first removed the  
182 protrusive components of the cilia using a low dose ethanol treatment (Stevenson & Beane, 2010). DHs  
183 were treated at Day 7 for 1 hour with 3% ethanol and did not show different repatterning speeds  
184 compared to untreated controls except at Day 7, measured 4 hours after ethanol treatment, indicating  
185 potential incomplete regeneration of cilia in this time frame (Figure 2C, Supplementary Table 3). This  
186 suggests that repatterning cannot be induced by removal and rebuilding of the external cilia structures.

187 Given the previous discovery that serotonergic neurons are responsible for controlling cilia  
188 beating in planarians (Currie & Pearson, 2013; Marz, Seebeck, & Bartscherer, 2013), we explored whether  
189 the same neurons also controlled cilia reorientation. We treated DHs with serotonin (Day 7 to Day 14),  
190 the serotonergic neurotoxin 5,7-dihydroxytryptamine (5,7-DHT)(Day 7 to Day 42), or the serotonin  
191 reuptake inhibitor fluoxetine (Day 7 to Day 42), but observed no difference in repatterning speeds for any  
192 of those treatments (Figure S5, Supplementary Table 4-6). Serotonin treatment itself drastically reduced  
193 cilia beating (Video 6) but after wash-out there was no difference in the position of the collision zone  
194 compared to controls (Figure S5C). These data suggest that cilia repatterning and cilia activity may be  
195 controlled via distinct neural circuits, although the sustained nature of our treatment may have  
196 differential effects compared to pulsatile signals arising naturally.

197 To investigate whether a disruption of the cytoskeleton can impact repatterning speeds, we  
198 treated repatterning animals with low doses of the highly specific actin depolymerizer Cytochalasin D  
199 (Schliwa, 1982) continuously from Day 7 to Day 42 (Figure 2D, Supplementary Table 7). We observed a  
200 significantly advanced collision zone at Days 21 and 28 in the Cytochalasin D treated animals (Figure 2D,  
201 Day 21 position of collision zone at 37% in Cytochalasin D treated animals and 33% body length in control,  
202 Day 28: 42% vs 37% for treated and control animals respectively, Supplementary Table 7). The final  
203 endpoint reached was the same for both control and Cytochalasin D treated animals, suggesting that actin  
204 depolymerization does not impact the underlying signal and final outcomes, but rather speeds up the  
205 process by which the cilia reorientation occurs.



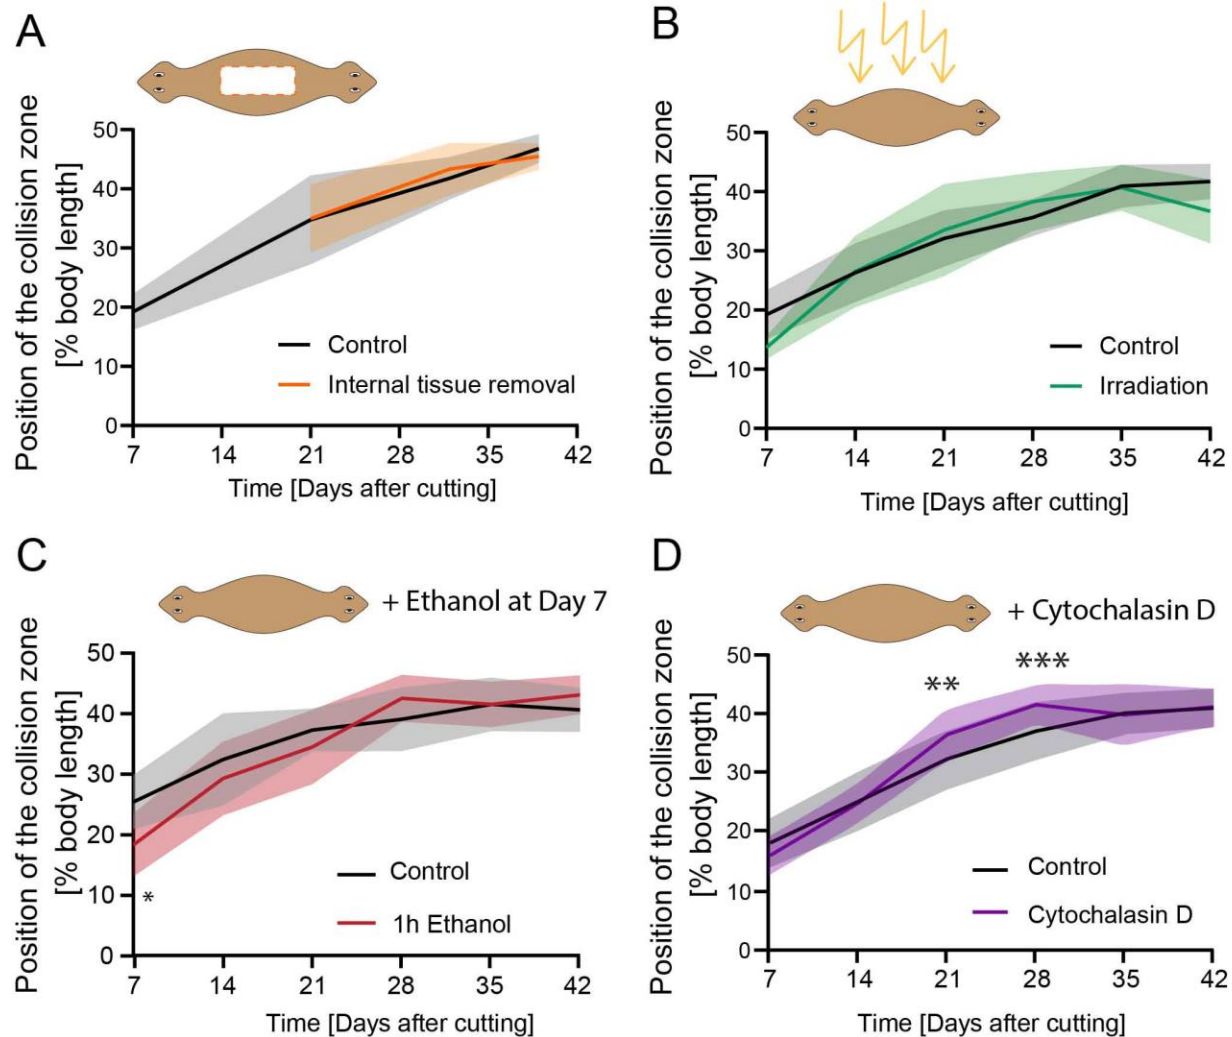

206

207 **Figure 2: Reorientation of cilia does not rely on cell turnover but is affected by changes to actin cytoskeleton.** A)  
 208 Position of the collision zone over time in animals that had a large portion of tissue removed from their interior  
 209 (orange line), compared to controls (black); there is no difference in repatterning speed, n=12. B) Repatterning in  
 210 animals treated with high levels of radiation to prevent new cell formation (green), compared to controls (black);  
 211 there is no significant difference in repatterning speed, n=12, with 3 repeats showing same pattern. C) Position of  
 212 the collision zone in DHs which were treated with 3 % ethanol for 1 h at Day 7 to remove external cilia (red); there  
 213 is no difference in repatterning compared to control (black), except at Day 7 immediately following treatment. n=12.  
 214 D) Continuous treatment of DH animals with Cytochalasin D (purple) for duration of the experiment compared to  
 215 control (black) reveals significantly more advanced position of the collision zone for treated animals at Day 21 and  
 216 Day 28, \*\* p<0.001, \*\*\* p<0.0001. N=12, with 3 repeats showing same pattern. The mean of all samples is plotted.  
 217 Shaded area represents standard deviation. All experimental worms were compared to age-matched controls.

218

219 *Repatterning is dependent on the presence of the head*

220 Given the recent characterization of the importance of brain-derived signals in morphogenesis  
 221 (Herrera-Rincon, Pai, Moran, Lemire, & Levin, 2017), and the observation that cilia repatterning extends  
 222 from the new head towards the middle of the body (Figure 1D), we hypothesized that one or both brains

223 in a DH animal may be driving remodeling. Firstly, we characterized if the relative smaller size of the  
224 secondary brain might be affecting its ability to drive cilia repatterning. We measured brain size in the  
225 two brains of DHs using immunostaining for synapsin at different timepoints and quantifying the length  
226 of the brain (Figure 3A and B). We observed that early during DH development, between Day 7 and Day  
227 21, there is a great variability in the relative brain lengths between the two heads of the same animal. This  
228 indicates that some animals have a much more developed primary brain compared to their secondary  
229 brain, while other DH animals have evenly sized brains already at Day 7. The variability reduced  
230 progressively from Day 7 to Day 21, when it reached stable values that did not change over the next 22  
231 days until Day 43. We did not observe any correlation between large differences in relative brain size and  
232 either positional origin of the fragments cut to induce DHs within the original single-headed (SH) animal  
233 (Figure S6A) or overall DH size (Figure S6B). Given the highly consistent repatterning speed across all DHs  
234 and the simultaneous diversity of brain sizes, it appears that the secondary brain size does not affect ciliary  
235 repatterning.

236 To test the influence of the primary and secondary head on repatterning, DHs at Day 7 were  
237 irradiated and then decapitated. Irradiation was performed prior to amputation to prevent regrowth of  
238 the removed tissue. As previously shown (Figure 2B), irradiation does not, by itself, impact repatterning.  
239 However, removal of the primary head following irradiation led to a significant increase in repatterning  
240 speed, with the collision zone being positioned significantly further towards the animal's midsection  
241 compared to controls at all timepoints from Day 14 onward (Figure 4A and C, Video 7, Supplementary  
242 Table 8). The removal of the secondary head lead to a reduction of repatterning, with the collision zone  
243 advancing significantly less at all timepoints after Day 14 (Figure 4B and C, Video 7, Supplementary Table  
244 9). This indicates that the two heads control cilia reorientation, with the secondary head driving  
245 reorientation and the primary head opposing it.

246 To establish whether the reorientation process can take place when both heads are absent, we  
247 removed both heads of the DH at Day 7 following irradiation before observing repatterning (Figure 4D  
248 and E, Supplementary Table 10). Removal of both heads results in repatterning being significantly slower  
249 than in controls, to a similar extent as observed for the removal of only the secondary head. The fact that  
250 removal of both heads and removal of only the secondary head give such similar results indicates that the  
251 secondary head serves as the main driving force in repatterning – removal of the inhibitory force of the  
252 primary brain is not sufficient for repatterning to happen in the absence of the driving force of the  
253 secondary brain. At the same time, the collision zone in these double-decapitated animals moves from an  
254 average position of 18% body length to 29% body length between Day 7 and Day 42. This may indicate  
255 that some head-independent process is able to induce some repatterning or reflect an effect induced  
256 before the treatment took effect.

257 For a limited number of DH animals in which the primary head was removed, we observed that  
258 the secondary head dominated reorientation to the point where the collision zone crossed the midpoint  
259 of the animal. Irradiated and decapitated animals, however, died before a sufficient number showed  
260 repatterning beyond the midpoint to firmly conclude whether removal of the primary head could allow  
261 secondary head-mediated repatterning to progress beyond the midpoint far into the primary half of the  
262 animal. We therefore took non-irradiated animals and amputated the primary head at Day 7 and then  
263 every other day to maintain a worm with no primary head without relying on irradiation. Care was taken  
264 to only remove blastema tissue in subsequent amputations. These DHs, which were continuously  
265 decapitated on the primary head side, showed repatterning of the cilia leading to the collision zone

266 crossing the midpoint and reaching a collision zone at 86% body length in the most advanced example,  
267 while controls did not repattern across the midpoint (Figure S7, Video 8, Supplementary Table 11).  
268 Repatterning of cilia reorientation across the whole animal, i.e. collision zone reaching 100%, was not  
269 observed, because the animals were not of a sufficient size to allow the assay to be continued after Day  
270 63. The steady slope of the repatterning curve in the continuously repatterning animals however suggests  
271 that full reversal of cilia polarity could be achieved. This indicated that there is no set midpoint marked  
272 independent of head presence.

273 The importance of the head in controlling cilia reorientation led us to first investigate whether  
274 removal of the anterior pole of the animal, known to express the gene *notum* and to be crucial for tissue  
275 organization in planarians (C.P. Petersen & Reddien, 2011), was responsible for the remodeling effect we  
276 observed following head removal. We found that removal of just the tip of the secondary head in a non-  
277 regenerative irradiated animal did not impact repatterning (Figure S8, Supplementary Table 12). This  
278 strongly implicates that *notum* signaling is not required for repatterning of the ciliated epithelium and  
279 implicates the brain as the driving factor of repatterning.

280 It is clear that the presence of the secondary head is crucial in driving the repatterning in the  
281 developing DH. To determine whether this is only true during the initial repatterning or whether the  
282 presence of the head is required for maintenance of the midpoint, we performed decapitations following  
283 irradiation in DHs at Day 49. In these animals the collision zone had reached the midpoint before they  
284 were decapitated. In the 21 days following decapitation at Day 49, we did not observe any change in the  
285 position of the collision zone (Figure S9, Video 9, Supplementary Table 13). Similarly, decapitating  
286 irradiated SH animals did not lead to a change in flow pattern (Video 10). These data indicate that once  
287 the position of the collision zone is established, the presence of the brain is no longer required for  
288 maintaining its position or organizing cilia beat pattern. Overall, it appears that each brain provides an  
289 influence during early establishment of cilia orientation, but once patterning is complete it is not required  
290 to maintain the cilia orientation.

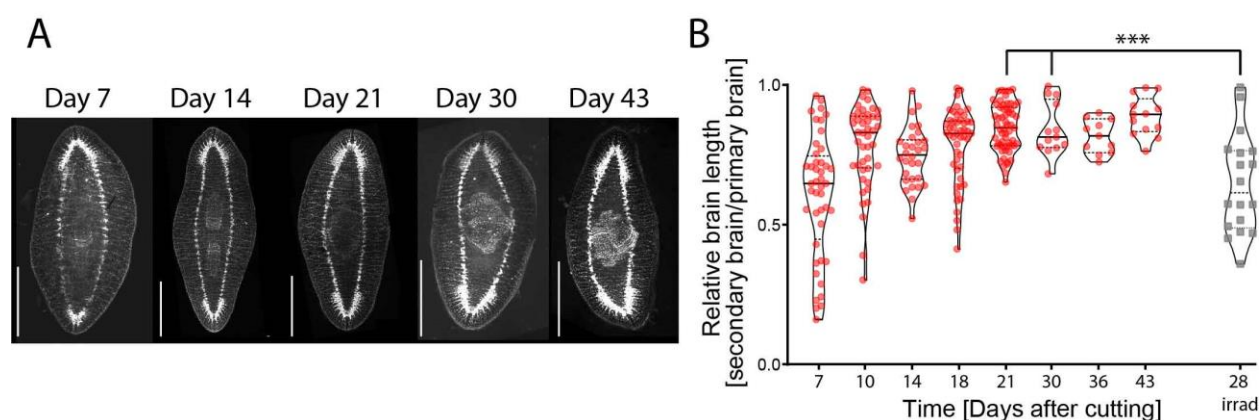

291  
292 **Figure 3: Brain size in DHs changes over time.** A) Staining of the nervous system of DH planarians from Day 7 to Day  
293 43 using synapsin antibody staining shows the different sizes of the brain in the primary and secondary head at the  
294 early time points. Animals are oriented with the primary head towards the top. B) Quantification of relative brain  
295 length in secondary and primary brain over time in untreated double-headed animals (red), and animals irradiated  
296 at Day 7 and stained at Day 28 (grey), which shows a reduction in the variability of brain size over time, except for  
297 irradiated samples. Brain length was measured in synapsin stains from base of brain where ventral nerve cords  
298 (VNCs) widen, to the tip of the brain, where the two halves meet. Scale bar 1 mm. \*\*\*  $p < 0.0001$

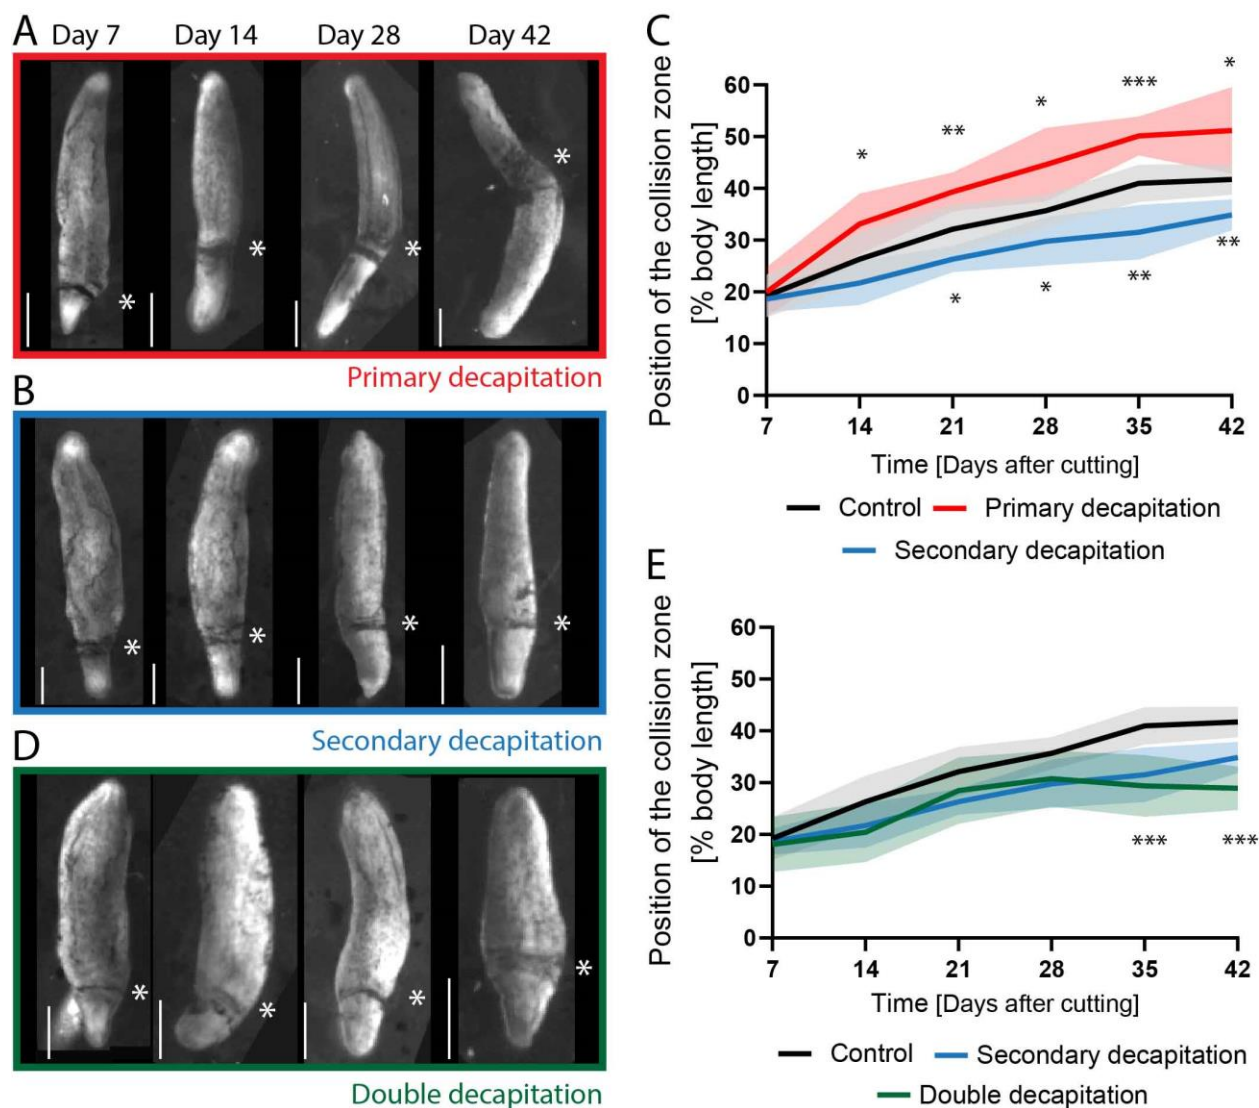

299 **Figure 4: The presence of the heads controls cilia reorientation.** A) Position of the collision zone (asterisk) in DH  
 300 animals irradiated at Day 7 and with their primary head removed at Day 7, 14, 28 and 42, which shows the advance  
 301 of the collision zone across the midpoint at Day 42. B) Position of the collision zone (asterisk) in DH animals irradiated  
 302 at Day 7 and with their secondary head removed at same time points. C) Quantification of the position of the collision  
 303 zone in control animals (black curve) and in animals with either the primary head (red) or the secondary head (blue)  
 304 removed at Day 7 following irradiation. Removal of the primary head significantly speeds up repatterning, while  
 305 removal of the secondary head reduces the speed. D) Position of the collision zone (asterisk) in DH animals irradiated  
 306 at Day 7 and with both heads removed at same timepoints as above. E) Quantification of the position of collision  
 307 zone in animal with both heads removed (green), compared to control (black) and secondary decapitation (blue).  
 308 \* $p < 0.01$ , \*\* $p < 0.001$ , \*\*\*  $p < 0.0001$ . N=12, with 2 repeats showing same pattern. The mean of all samples is plotted.  
 309 Shaded area represents standard deviation. All experiments are paired with their respective controls. Scale bar 1  
 310 mm.  
 311

312 *An intact brain is required for driving repatterning*

313 We then investigated whether the overall mass of the brain was a key feature in the strength of  
 314 this repatterning effect. We removed half of the secondary head laterally (Figure 5A) following irradiation

315 at Day 7. These animals with only half the head removed repatterned at the same speed as animals that  
316 had the complete secondary head removed (Figure 5A, Supplementary Table 14). Notably, we never  
317 observed an angled collision zone, which indicates that the two lateral halves of the worm are not  
318 regulated independently from each other by the brain hemispheres (Figure S10). We also removed half of  
319 the head perpendicular to the head-head axis (cut at the eye plane, Figure 5B), which lead to an equivalent  
320 reduction in repatterning as lateral half-head removal (Figure 5B, Supplementary Table 15). These data  
321 indicate that presence of half the head is not sufficient to complete the function necessary to drive  
322 repatterning, independent of which half of the head is removed.

323 The observation that half-head removal was as effective at reducing repatterning as full head  
324 removal, led us to ask whether the small size of the secondary brain at the beginning of the repatterning  
325 process had an impact on repatterning speed such that a smaller brain cannot send the same signals as a  
326 fully formed brain to drive the repatterning. To answer this question, we investigated the brain size of  
327 DHs at Day 28 that had been irradiated at Day 7. Irradiation in these animals stopped their brain  
328 development and maintained the diversity of brain sizes observed at Day 7 until Day 28, making them  
329 significantly different from non-irradiated animals at Day 21 and Day 30 (Figure 3B, Supplementary Table  
330 16). Since irradiated animals repattern at the same rate as controls (Figure 2B), the smaller brain size of  
331 the secondary brain is not responsible for slower repatterning.

332 Given that small intact brains are capable of driving repatterning, while removal of half the brain  
333 significantly slowed repatterning, we asked whether any injury to the brain was sufficient to reduce  
334 repatterning by bisecting the two halves of the brain in the secondary head via a cut made from the head  
335 tip between the eyes in irradiated animals at Day 7 (Figure 5C, D). This cut persisted due to the inability  
336 to replace cells following irradiation and was sufficient to significantly reduce the repatterning speed  
337 similar as removal of half or the entire head (Figure 5C, Supplementary Table 17). Combined with the  
338 previous result, this suggests that it is the intact state of the brain, rather than its overall size, that matters  
339 for successful control of cilia reorientation, and suggest that functional signaling across the entire brain  
340 may be required for repatterning, as the amount of remaining tissue and any possible diffusion pathways  
341 are not affected by simple cut injuries.

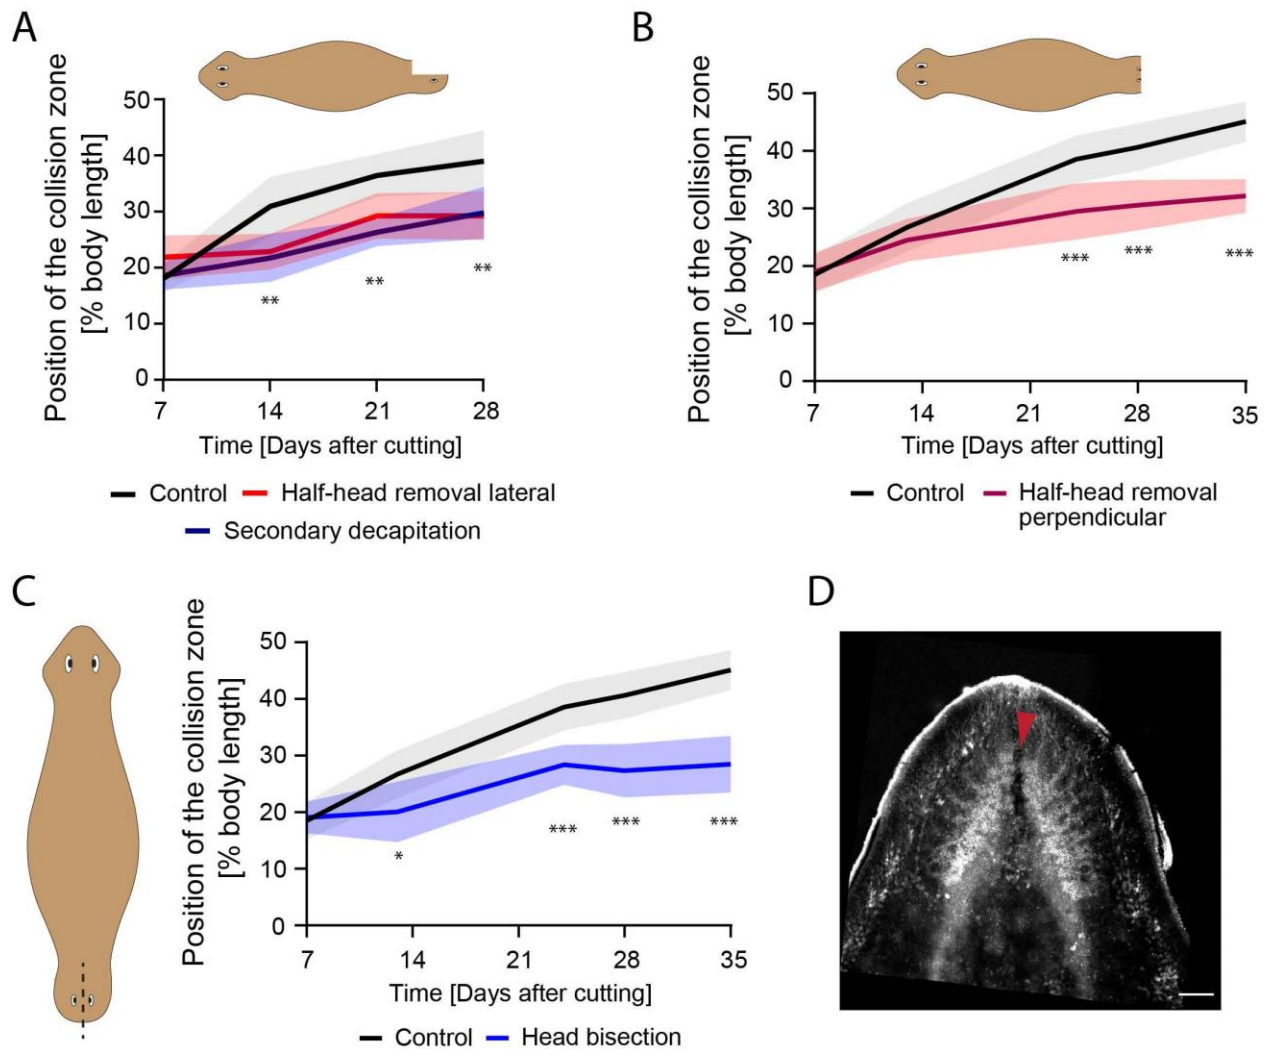

342

343 **Figure 5: An intact brain is critical for driving repatterning.** A) DHs with the lateral half of the secondary head  
 344 removed following irradiation at Day 7 (red) showed significantly reduced repatterning speed compared to control  
 345 (black) to the same extent as animals with the entire secondary head removed (blue). B) DHs with the frontal half of  
 346 the secondary head removed following irradiation at Day 7 (red) showed significantly reduced repatterning speed  
 347 compared to control (black). C) DHs with secondary head bisected laterally between the eyes without tissue removal  
 348 following irradiation at Day 7 (blue) repattern significantly slower compared to controls (black). D) Synapsin stain of  
 349 brain following head bisection without tissue removal. Red arrow highlighting disruption of the brain due to the head  
 350 bisecting cut. \*  $p < 0.01$ , \*\*  $p < 0.001$ , \*\*\*  $p < 0.0001$ .  $N=12$ . Plotted is mean of all samples, with standard deviation as  
 351 shaded area for all experiments with their age-matched controls. Scale bar 100  $\mu\text{m}$ .

352

353 *The signals that determine cilia repatterning are transmitted along axial structures*

354 Given the important instructive role of the intact brain in cilia repatterning in developing DHs, we  
 355 sought to understand by which pathway the repatterning signal is sent from the brain to the rest of the  
 356 body. To test whether the signal diffused through the body or was transmitted along axial structures, we  
 357 irradiated DHs at Day 7 and then cut them below either the primary or the secondary head (Figure 6 Ai,  
 358 Bi and Ci). The wounds healed, reforming the majority of the physical connection between head and body

359 (Figure 6 Aii, Bii, Cii) and allowing for diffusion to take place normally. Using synapsin staining, we showed  
360 that following these cuts the ventral nerve cords (VNCs) were severed and the connections did not reform  
361 in any of the tested animals due to irradiation-driven lack of new cell formation (Figure 6Aiv, v compared  
362 to Biv, v and Civ, v and Figure S11). External wound healing suggests that epidermal connections are  
363 reformed, but we did not explore whether muscle connections are reestablished. We found that this axial  
364 cut at either the primary or secondary head phenocopied the effect of entire head removal (Figure 6D,  
365 Video 11). Compared to controls (Figure 6A), animals with a lateral cut behind the primary head (Figure  
366 6B) reoriented their cilia significantly faster at all timepoints following Day 14 compared to controls (Figure  
367 6D, Supplementary Table 18). At the same time, DHs in which the body was cut behind the secondary  
368 head (Figure 6C) repatterned significantly slower, with the collision zone significantly less advanced at all  
369 timepoints following Day 14 (Figure 6D, Supplementary Table 19). These data support the hypothesis that  
370 the factors driving the repatterning are not diffusing through the mesenchyme but are transported along  
371 axial structures disrupted by the cut, such as the VNCs.

372 To further confirm that the factors driving repatterning travel the length of the body in long axial  
373 structures and to ascertain the spatial dynamics of this influence, we performed lateral cuts at different  
374 positions along the head-head axis following irradiation at Day 7 and observed the position of the collision  
375 zone at Day 21 (Figure 6E, Supplementary Table 20). When the DHs were cut in the middle of the body,  
376 the collision zone was positioned significantly further towards the midpoint compared to controls,  
377 mirroring cuts at the base of the primary head, consistent with the signal from the primary head having  
378 to be transmitted into the secondary half of the animal to block repatterning. Cuts at 1/3<sup>rd</sup> body length  
379 did not significantly differ from controls (Figure 6E, Supplementary Table 20), likely because the cut was  
380 placed close to the position of the collision zone, while animals with cuts between the secondary head  
381 and the collision zone (cut at the base of the secondary head) had a significantly lower position of the  
382 collision zone (Figure 6E, Supplementary Table 20).

383 We also performed lateral cuts which only went to the midline, disrupting only one of the VNCs  
384 at the base of the secondary head in irradiated worms. In these DHs we found that the depth of the cut  
385 did not impact its effect, with a cut severing most of the body resulting in the same repatterning delay as  
386 a cut only to the midline (Figure 6E). This result implicates the VNCs as the axial structures required for  
387 transmission of the molecules leading to repatterning, as disruption of one VNC is likely to disrupt nerve  
388 signaling, consistent with our observations following half-brain removal (Figure 5). Taken together, these  
389 data suggest that repatterning relies on the presence of an intact nervous system, potentially for transport  
390 of signals that direct repatterning of the cilia in the surrounding area.

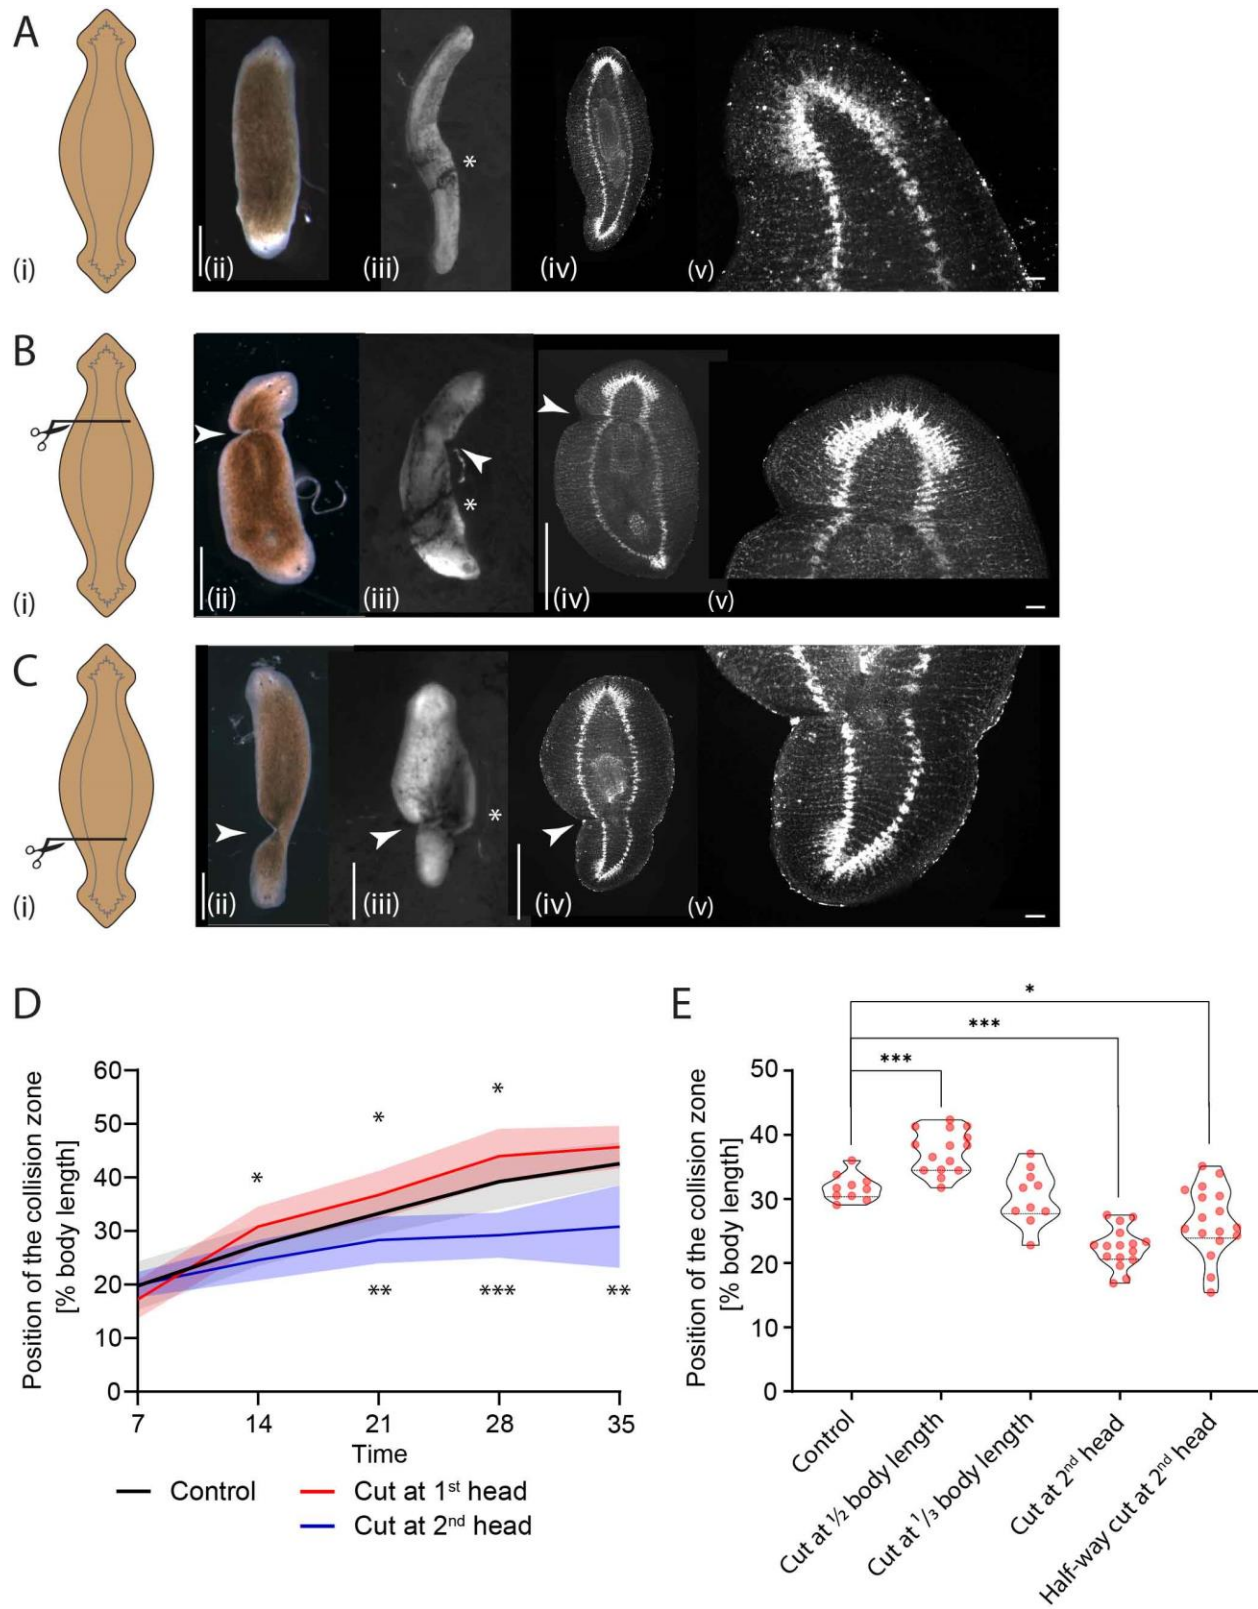

391  
392  
393  
394

**Figure 6: Remodeling-inducing signals from the brain are transmitted across the body.** A) Uncut control animals: sketch of animal with CNS (grey) (i), in brightfield at Day 7 (ii), flow assay result of the same animal at Day 28 (iii), synapsin stain in the same animal at Day 28 (iv), and higher magnification of intact VNCs (v). B) DH with cut at primary



395 head: sketch showing cut position with CNS (grey) (i), in brightfield at Day 7 (ii), flow assay result of the same animal  
396 at Day 28 (iii), synapsin stain in the same animal at Day 28 (iv), and higher magnification of cut VNCs confirming  
397 severance (v). C) DH with cut at secondary head: sketch of cut position with CNS (grey) (i), in brightfield at Day 7 (ii),  
398 flow assay result of the same animal at Day 28 (iii), matching synapsin stain at Day 28 (iv), and higher magnification  
399 of cut VNCs confirming severance (v). D) Quantification of position of the collision zone in animals with VNCs cut at  
400 either the primary head (red) or the secondary head (blue) at Day 7 following irradiation, showing significant  
401 difference compared to control (black). N=12. Plotted is mean of all samples, with standard deviation as shaded area,  
402 all experiments with their age-matched controls. E) Position of collision zone at Day 21 in animals treated at Day 7  
403 compared to controls, with animals with cut at midpoint, cut at 1/4<sup>th</sup> body length, cut at base of 2<sup>nd</sup> head, as well as  
404 animals with cut to midline at base of 2<sup>nd</sup> head – all in the secondary half. \*p<0.01, \*\* p<0.001, \*\*\*p<0.0001.  
405 Arrowheads mark the cut sites. Scale bar 1mm, in insets 100  $\mu$ m.

406

#### 407 *Nervous system in double-headed worms repatterns over time*

408 Given the importance of the nervous system in the adaptation of the tissue polarity of the ventral  
409 epithelium, we next explored whether the polarity of the nervous system itself is affected in these  
410 repatterning DHs. Our previous work showed that morphogen transport in the nervous system plays an  
411 important role in determining regenerative outcomes and that mature DHs have a morphogen transport  
412 field that is mirror-symmetrical along the midline (Pietak et al., 2019). In the previous work, we showed  
413 that in mature DHs different cutting planes led to distinct regenerative outcomes based on whether the  
414 fragment included the midpoint of the animal, where we suggest the two halves of the nervous system  
415 meet. Fragments containing the midpoints always regenerate as DHs, while any non-midpoint fragments  
416 regenerated as single-headed animals (SHs) (Pietak et al., 2019). Given that the symmetry point of the  
417 multiciliated epithelium shifts between immature and mature DHs, we asked whether the symmetry point  
418 of the nervous system is similarly affected by assaying its ability to instruct polarity during regeneration.

419 Our nerve-transport data suggest that if repatterning of the nervous system takes place, the  
420 regenerative outcomes of identical amputations performed in 7-day old DHs and 49-day old DHs will be  
421 different as the underlying transport field is distinct (Figure 7A). We performed amputations at three  
422 different planes: a narrow decapitation directly at the base of one of the heads (around 1/6<sup>th</sup> of the body  
423 length), a cut positioned 1/4<sup>th</sup> of the way along the head-head axis, and a cut bisecting the DH animals in  
424 half. While the decapitations lead to the same regenerative outcomes in both mature and immature DHs,  
425 cuts positioned at 1/4<sup>th</sup> of the body length and at the middle of the body lead to distinct regenerative  
426 outcomes for immature and mature DHs.

427 For the cuts positioned at 1/4<sup>th</sup> of the body length in mature DHs the larger fragment (containing  
428 the midpoint) regenerated significantly more often as a DH compared to immature DHs (87% vs. 31%,  
429 p<0.0001, Supplementary Table 21). In immature DHs, both the 1/4<sup>th</sup> and the 3/4<sup>th</sup> fragments regenerated  
430 as DHs at similar percentages (29% vs. 31%). This suggests that when a cut is placed at around 1/4<sup>th</sup> of the  
431 way from the secondary to the primary head, in approximately one third of the cases the symmetry point  
432 of the nervous system is destroyed via cutting, leading to just SH regeneration, while in the other two-  
433 thirds of cases the symmetry point is located in either one of the two fragments leading to a regenerative  
434 outcome of one DH and one SH, suggesting that the location of the symmetry point of the nervous system  
435 at Day 7 is located around 1/4<sup>th</sup> of the body length away from the secondary head. When mature DHs  
436 were cut in half, both halves regenerated mostly as SHs (84% SHs), while for immature DHs the two halves  
437 behaved very differently. The half containing the primary head almost always regenerated as SH (96%),

438 while the half containing the secondary head almost always regenerated as a DH (97%) (Figure 7A). These  
439 data reveal that the symmetry point of the DH nervous system is positioned very off-center in an immature  
440 DH, somewhere around the 1/4<sup>th</sup> body length point, while it is positioned in the middle in mature DHs,  
441 supporting the hypothesis that the nervous system polarity adapts in parallel with the polarity of the  
442 ciliated epithelium. The position of the symmetry point of the nervous system in DHs at Day 7 suggested  
443 by these experiments at around 1/4<sup>th</sup> of the body length is consistent with the cilia-flow collision zone  
444 located at 27% of body length on average at Day 7.

445 To show that the underlying orientation of the VNCs in immature and mature DHs is different, we  
446 generated side-wounds innervated with a single VNC in both mature and immature DHs (Figure 7B). In  
447 the immature DHs, where a distinction between the primary and secondary head could be identified  
448 visually, the wounds were induced either facing towards the primary or the secondary head, at about 1/3<sup>rd</sup>  
449 of the body length away from the head they were facing towards. The induced outgrowths were scored  
450 for either head or tail identity using both appearance and synapsin staining to visualize the nervous system  
451 structures. In immature DHs, side outgrowths facing towards the primary head regenerated with a head  
452 93% of the time (39/42, Figure 7 Bi-iii), while the outgrowths facing towards the secondary head  
453 regenerated as tails 88% of the time (37/42, Figure 7 Biv-vi). In mature DHs, no distinction between  
454 primary and secondary head remains apparent to guide the positioning of cuts, therefore the comparative  
455 outcome to the immature DH result would be 50% heads and 50% tail regenerates in the side outgrowths,  
456 as samples are an equal mix of cuts facing the primary and the secondary head. However, we observed  
457 93% head outgrowths, consistent with a repatterning of the nervous system occurring as DHs mature,  
458 (Figure 7B vii-ix). Taken together, these data reveal that the instructive influence of the CNS over the type  
459 of anatomical structures that will be formed after amputation changes over a much longer timescale than  
460 regeneration itself: in a mature double-headed animal, the CNS and tissue polarity remodel progressively  
461 (Figure 7C). Thus, the progressive remodeling of tissue polarity affects not only the epidermis but also the  
462 instructive aspects of the CNS.

463

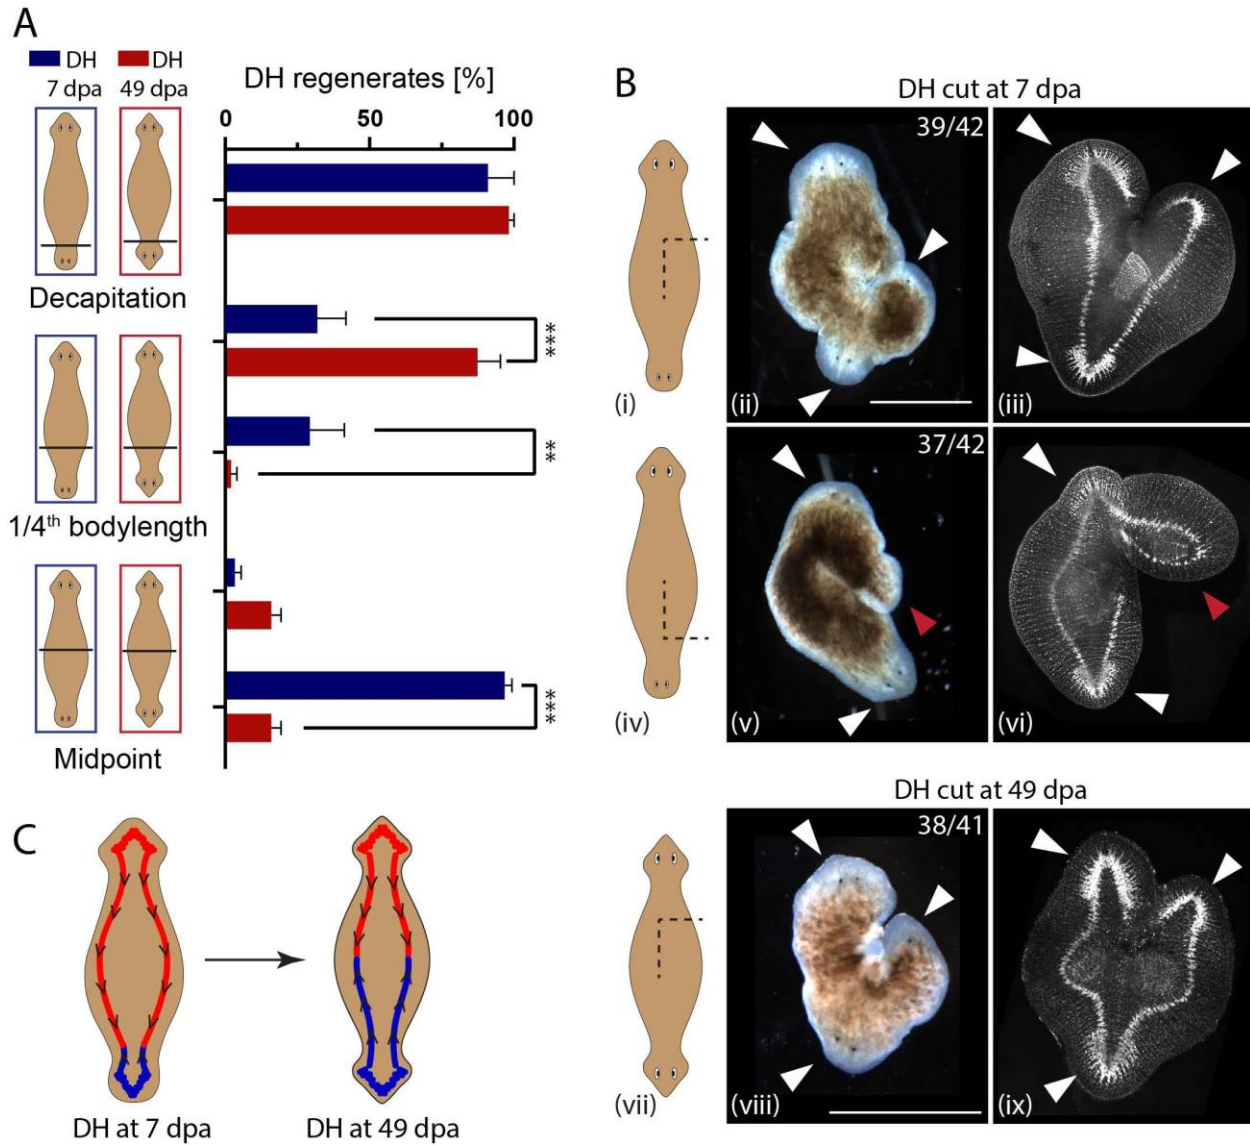

465 **Figure 7: The CNS' influence over polarity during regeneration changes spatially over time.** A) Percentage of DH  
 466 regenerates from DHs cut at various locations along the body axis. Cuts were performed either in animals at Day 7  
 467 (blue) or Day 49 (red) (days after amputation – dpa). Decapitation resulted in 96% and 98% DH for Day 7 and Day 49  
 468 animals, respectively. Fragment consisting of 3/4<sup>th</sup> of the body regenerated at 28% vs. 87% DHs, while the 1/4<sup>th</sup>  
 469 fragments regenerated only 29% and 2% DHs for Day 7 and Day 49, respectively. Midway cuts gave 16% DH  
 470 regenerates for both halves of DHs at Day 49, while DHs at Day 7 had 3% of the primary half regenerating as DHs,  
 471 while 97% of the secondary halves regenerates as DHs. N=4, with 15 worms per replicate. B) Regenerative outcomes  
 472 of induced side-outgrowths facing either (i-iii) towards the primary head or (iv-vi) towards the secondary head in  
 473 DHs at Day 7 and (vii-ix) in DHs at Day 49, shown as sketch (left column), in brightfield (middle column) and in  
 474 synapsin antibody stain, visualizing the nervous system (right column). Frequency of the observed outcomes is given  
 475 in each panel. White arrow – head regeneration, red arrow – tail regeneration. C) Model of the nervous system  
 476 polarity in double-headed animals at Day 7 and Day 49, representing the change in orientation in the secondary half  
 477 of the animal as it adapts to the new morphology. \*\* p<0.01, \*\*\* p<0.0001, plotted are mean values with error bars  
 478 representing standard deviation. Scale bars 1 mm.

## 479 Discussion

480 Regeneration is a remarkable process because the activities of individual cells (migration,  
481 differentiation, proliferation, and shape change) need to be orchestrated toward a specific large-scale  
482 anatomical outcome. Order is simultaneously regulated at multiple scales and levels of organization,  
483 including tissues, organs, and whole-body axes. Planarian regeneration illustrates the ability of some  
484 systems to establish organs and physiological signaling systems in precise spatial coordination. This  
485 requires information about direction (alignment of planar polarity) as well as position (which organ to  
486 make at what location), but it is still very poorly understood how these distinct systems functionally  
487 interact. This is important not only for cell and developmental biology, but also for biomedicine. For  
488 example, planar polarity disruption is a known factor in carcinogenesis (Lee & Vasioukhin, 2008). Likewise,  
489 in the case of embryonic left-right patterning, significant birth defects occur when the cell-level alignment  
490 in organs such as the heart does not match the mirror-image inversion of body asymmetry (Delhaas,  
491 Decaluwe, Rubbens, Kerckhoffs, & Arts, 2004). Here, we exploited the planarian model system to reveal  
492 novel aspects of the linkage between axial and cell-level polarities, the role of the CNS in propagating the  
493 instructive signals that connect them, and the ways in which existing, well-formed tissues are remodeled  
494 in place to achieve the concordance between tissue polarity and organismal polarity.

495 We present evidence that planarians, which implement atypical body morphologies following  
496 interventions in normal regenerative signaling pathways, adjust the polarity of their existing tissues to  
497 align with these new morphologies on long timescales. DH planarians possess, in addition to their normal  
498 head positioned on the original anterior end, a secondary head positioned on the original posterior. This  
499 system gives us the opportunity to explore how planar cell polarity signaling, as read out by cilia  
500 orientation (Vu et al., 2018; Wallingford, 2010), changes in response to changes of overall organismal  
501 polarity. We show that cilia beat direction reverses in the portion of the double-headed animals that  
502 switches from a posterior to an anterior identity over a period of around 40 days. This long repatterning  
503 timeframe places this process outside of the normal regenerative timeframe commonly explored in  
504 studies with planarians, highlighting the importance of monitoring long-range remodeling events past the  
505 time when the damaged or missing tissues have been repaired or replaced.

506 The orientation of cilia is usually set during development or regeneration and is assumed to not  
507 to change once established. Here we have identified a system in which the dynamic reorientation of cilia  
508 induced by physiological signals, can be explored, thanks to the flexibility of the planaria body plan. The  
509 formation of new cells can be efficiently inhibited in planaria via irradiation, resulting in the death of the  
510 stem cells, while the non-dividing somatic tissue survives. We found that inhibition of new cell formation  
511 did not impact the reorientation of cilia, indicating that the reorientation of the cilia likely takes place in  
512 pre-existing multiciliated cells.

513 Exposure to the actin depolarizer Cytochalasin D speeds up the cilia reorientation process. We  
514 hypothesize that this effect may be due to a loosening of the actin cortex through depolymerization,  
515 allowing the basal bodies, whose attachment determines cilia beat orientation, to change their  
516 orientation easier, potentially by detaching from the membrane and reattach in the correct orientation.  
517 While the observed effect on cilia reorientation by cytochalasin D-driven actin depolymerization may be  
518 indirectly mediated via a number of different mechanisms, the crowded actin cortex in which the basal  
519 bodies are embedded offers a tantalizing explanation for this observation, where a reduction of cortex  
520 thickness or density may make reorientation of the cilia basal bodies easier. It is established, both in

521 *Xenopus* embryos and developing mouse airway epithelia, that the actin cortex interacts with basal bodies  
522 to mediate basal body attachments and cilia orientation in development (Pan, You, Huang, & Brody, 2007;  
523 Panizzi, Jessen, Drummond, & Solnica-Krezel, 2007; Werner et al., 2011). Our data on actin  
524 depolymerization suggests that reorientation of planarian cilia during DH repatterning may follow a  
525 similar molecular process as the original establishment of cilia orientation in these developmental  
526 systems, giving subcellular level insights into the process driving reorientation of cilia.

527 We show that the reorientation of tissue is linked to the organism-scale polarity via signals from  
528 the brain which may be transmitted along the ventral nerve cords (VNCs), given that removal of the heads  
529 and lateral incisions leading to bisection of the VNCs affect the speed and extent of the repatterning  
530 similarly. We cannot rule out that other structures transmit the signaling factors driving repatterning, such  
531 as gap-junction-linked epidermal cells or the musculature which spans the length of the body, until further  
532 tools become available allowing us to identify signaling factor and its transport mechanism in more detail.  
533 The requirement for signals from the brain makes a transport of signaling factor along the VNCs a likely  
534 solution, as no transfer of the signal between different cell types would be necessary. The formation of  
535 an additional brain in the double-headed animal may provide an intrinsic signaling source to drive the  
536 required repatterning through the nervous system spanning the body. Our finding that bisection of the  
537 brain, without removal of tissue, results in the same magnitude of repatterning inhibition as removal of  
538 the entire head, suggests that the signal from the brain that drives repatterning relies on the intactness  
539 of the brain and is therefore likely to be a consequence of overall brain function or requires transport  
540 across the brain. Consistent with this idea, the overall size of the brain does not appear to influence in the  
541 rate of repatterning as long as it is intact, as indicated by irradiated animals which repattern normally  
542 even though they have very differently sized brains.

543 While signals from the brain are the major drivers of repatterning, a small amount of repatterning  
544 continues to happen after removal of both heads, which can be interpreted either as signal sent before  
545 decapitation continuing to be put into effect, or as a rudimentary repatterning system capable of driving  
546 limited repatterning via a different mechanism. This secondary repatterning mechanism can be  
547 speculated to consist of local PCP signaling, which is transmitted from cell to cell, leading to slower  
548 repatterning than that mediated by a neural path. We have hypothesized elsewhere that neural  
549 connections may have evolved in part to provide an optimized version of pre-neural signaling events  
550 operating in pattern regulation (Fields, Bischof, & Levin, 2019), so perhaps the repatterning that occurs in  
551 the absence of a head is an example of less efficient, ancestral non-neural patterning.

552 We find that during DH maturation, the midpoint is not fixed, given that the collision zone can be  
553 shifted across the midline through continuous removal of the primary head. While we were unable to  
554 keep the worms alive long enough to test whether full reversal of cilia beat direction across the entire  
555 animal is possible, our data suggest that it is. Our data illustrate that there is no secondary, underlying  
556 signal setting the midpoint of the epithelium but that this midpoint solely arises in normal DHs from the  
557 balance of signaling forces from the two heads.

558 At the same time, there appears to be a window of time after which the orientation of the cilia is  
559 set and can no longer be affected by removal of the animal's head, as demonstrated by the lack of change  
560 in the position of the collision zone in mature DHs that had one head removed. Similarly, signals from the  
561 brain do not appear to be important for maintaining cilia orientation in single-headed animals. This  
562 suggests that there is a window of plasticity, during which signals from the brain can fully determine the

563 polarity of the epithelium, but that once this window closes, cilia orientation is set, likely until changes  
564 induced by the regeneration of damaged or lost tissue occurs. This observation is reminiscent of data in  
565 developmental systems, where cilia orientation and tissue polarity are set in certain developmental  
566 timeframes (Boisvieux-Ulrich, Sandoz, & Allart, 1991; Tung & Yeh-Tung, 1940; Twitty, 1928). What signals  
567 determine this plasticity in planarians remain to be addressed in future work.

568         Importantly, the link between global organ distribution and underlying tissue polarity exists in the  
569 nervous system too, not only in the epidermis. Our previous work showed how the global transport  
570 direction of the nervous system determines regenerative outcomes (Pietak et al., 2019). Here we  
571 observed that in maturing DHs, the symmetry point of the transport field of the nervous system shifts  
572 progressively to the middle of the animal, as revealed by the distinct regenerative outcomes of the same  
573 cuts along the body axis in immature and mature DHs. This suggests that the nervous system changes its  
574 overall polarity to adapt to the new, artificially induced morphologies. This is an extreme example of  
575 neuronal plasticity, opening new questions about what signals drive the changes in neural polarity and  
576 how correct and functional connections can re-form without interfering with CNS functions necessary for  
577 the animal to survive and continue its normal activity.

578         This work uses the dynamic body plan of the planarians as a way to explore multi-scale polarity *in*  
579 *vivo*. While organ structures are formed by the activity of cells, this bottom-up, self-assembly mechanism  
580 is complemented by top-down controls in which axial polarity drives changes of tissue-level directionality.  
581 The dynamic regeneration and repatterning of adult tissues in planarians offer an exciting addition to  
582 investigations of polarity in developmental systems. The mechanism of repatterning of the ciliated  
583 epithelium under the control of signals from the brain further highlights the importance of the nervous  
584 system as an overarching organizing system to coordinate and set polarity in regeneration and  
585 repatterning. At the same time the polarity control by the nervous system may be a bi-directional process,  
586 in which the nervous system acts both as a mediator of remodeling signals to the epithelium and at the  
587 same time is the target of remodeling. Beyond planarians, these findings suggest approaches that exploit  
588 brain-like signaling to understand and manipulate multi-scale order in bioengineering and developmental  
589 contexts.

590

## 591 **Materials & Methods**

### 592 Planaria colony care:

593 Planaria of the species *Dugesia japonica* were maintained in a colony at 13 °C in Poland Spring water, fed  
594 once a week with calf liver paste and cleaned twice a week, as described in (Oviedo, Nicolas, Adams, &  
595 Levin, 2008). Animals were maintained at 13 °C for the time course of the entire experiment to prevent  
596 fissioning and were therefore taken from the cold-adapted colony at 13 °C, which is continuously kept at  
597 this temperature. Animals were starved for 1 week before use in experiments and for the course of the  
598 entire experiment to reduce variability due to metabolic state.

### 599 Double-head induction:

600 Double-headed planaria were generated by excision of pharynx and pre-tail fragments from planaria.  
601 These fragments were placed in 127 µM Octanol for 3 days before the solution was replaced with Poland  
602 Spring water and allowed to regenerate at 20 °C (Durant et al., 2017). Double-head regenerative outcomes  
603 were scored 7 days after cutting by the presence of a head, marked by at least one eye spot, on either  
604 end of the fragment. Double-head animal age was calculated based on the original cut, i.e. freshly  
605 regenerated DHs when they are selected, are here termed Day 7 DHs.

### 606 Flow assay:

607 Flow assays were performed based on original experiments in (Rustia, 1925). To detect cilia-driven flow,  
608 planaria were placed in a small dish with water, ventral-side up, so that they attached to the water surface.  
609 Carmine powder (Sigma-Aldrich, Darmstadt, Germany) was sprinkled on top of the worms. Powder and  
610 slime build-up was repeatedly removed using a paint brush. Movement of the powder particles was  
611 recorded on a Nikon AZ100M Multizoom Macroscope with a 0.5x objective and side-illumination from a  
612 Volpi IntraLED lightsource, using an Andor DL-604M camera. Movement was recorded at a frame rate of  
613 100 ms. Animals were observed until powder accumulation reflecting cilia-driven flow had happened at  
614 least twice. Animals were washed 3 times in Poland Spring water to remove remaining carmine powder.  
615 Animals were maintained at 13 °C for duration of the repatterning assessment and were not fed.

616 Position of the collision zone was measured in ImageJ, where worm length and length from second head  
617 to midpoint of the powder collection point was measured. Both values were measured in worms which  
618 had even extension across the entire length of their body.

619 Particle image velocimetry (PIV) was performed using Matlab (Mathworks, Natick, MA) with the PIVlab  
620 program (Thielicke & Stamhuis, 2014, 2019). For the analysis, 2 sec segments were selected in which the  
621 worm exhibited little muscle movement and PIV was calculated in an interrogation window of 64 x 48 x  
622 32 pixels for subsequent passes of the program, run on all frames, smoothed and all frames in the 2 sec  
623 segment were averaged to give flow pattern.

### 624 Animal manipulations:

625 Animals were irradiated using Nordion Gamma Cell 1000 Irradiator with a Cesium-137 radiation source  
626 with a dose of 200 Gy achieved via 30 min exposure at Day 7, unless otherwise specified.

627 Primary and secondary head identity was determined in animals at Day 7 based on development of head  
628 structures (eye size, pigmentation and auricle development) as well as overall movement pattern of the  
629 animal.

630 Decapitations were performed at the base of the head, directly underneath the auricles, at Day 7. Lateral  
631 cutting was performed at the respective positions between the two heads in animals placed ventral side  
632 up, so that ventral nerve cords were visible and cut as far across the body as necessary to sever both nerve  
633 cords, or to the midpoint for single VNC cutting. Nerve cord deviation was performed by cutting  
634 perpendicular to the head-head axis at the given point up to the midline of the worm and then continued  
635 along the midline, as described in (Pietak et al., 2019). In both cases cuts were reinforced every day for 7  
636 days and worms were maintained at 13°C during cutting and regeneration. Regenerative outcomes were  
637 scored at Day 14.

638 Half-head removal, both lateral and perpendicular, was performed in DHs at Day 7 following irradiation.  
639 The secondary head of the animals was cut in all these cases. For lateral head removal a cut was placed  
640 downward between the eyes and then perpendicular at the base of the head to remove half of the head.  
641 For the perpendicular half-head removal, the cutting plane was perpendicular to the body axis and set at  
642 the plane of the eyes. Cuts were confirmed using synapsin staining.

643 Cuts bisecting the brain were performed in DHs at Day 7 following irradiation, targeting the secondary  
644 head. The cut was placed downwards between the eyes to the base of the head. The cut was re-enforced  
645 for 3 days following the initial cut.

646 Internal tissue removal was performed using square glass capillaries of a 1 mm<sup>2</sup> inner diameter and 0.1  
647 mm wall thickness (VitroCom, Mountain Lakes, NJ), using a fine paint brush to remove the cut tissue from  
648 the middle of the animal.

649 Double-headed animals at Day 7 and Day 49 were cut perpendicular to the head-head axis either at the  
650 midpoint between the two heads, halfway between the midpoint and the head, i.e. at 25% body length,  
651 and directly at the base of either the primary or secondary head. Fragments regenerated at 20°C for 14  
652 days before scoring regenerative outcomes by counting number of single-headed and double-headed  
653 regenerates.

654 Brightfield pictures of animals were taken on a Nikon SMZ1500.

#### 655 Drug treatments

656 Chemicals used to disrupt the cilia repatterning process were applied to freshly regenerated DHs at Day 7  
657 and maintained throughout the repatterning process with weekly replacement of drugs, unless otherwise  
658 noted. Inhibitors used were Cytochalasin D (Sigma) at 1 µM final concentration from stock dissolved in  
659 Ethanol, Serotonin (Sigma) at a final concentration of 0.5 mM from a stock dissolved in H<sub>2</sub>O, Fluoxetine  
660 (Sigma) at a final concentration of 2 µM from a stock dissolved in DMSO, and 5,7-Dihydroxytryptamine  
661 (ThermoFisher Scientific, Waltham, MA) at a final concentration of 75 µM from a stock dissolved in H<sub>2</sub>O.

662 200 proof Ethanol (VWR, Radnor, PA) was used at 3% in Poland spring water to briefly disrupt cilia  
663 (Stevenson & Beane, 2010) by incubating for 1 h before washing out.

#### 664 Fixation and Immunohistochemistry



665 Animals were fixed at the described time point using an 2% HCl treatment for 2 min followed by incubation  
666 in Carnoy's fixative (60% Ethanol, 30% Chloroform, 10% Acetic Acid) on ice for 2 hours, before washing  
667 with Methanol at -20 °C and overnight bleaching with 10% H<sub>2</sub>O<sub>2</sub> in Methanol. Fixed samples were stained  
668 using the VSI InSitu Pro robot (Intavis, Cologne, Germany), specifically rehydrated in PBSTx (1x PBS with  
669 0.3% Triton X-100), blocked in 10% Goat serum in PBSTx+B (1x PBS with 0.3% Triton X-100 and 10% BSA)  
670 for 6 hours, stained in primary and secondary antibodies (10 hours at 4 °C for both) and washed with  
671 PBSTx (2x 20 min and 1x 1 hour). The primary antibody used were - for synapsin, mouse-anti-synapsin  
672 (SYNORF1) antibody at 1:50 (Developmental Studies Hybridoma Bank (DSHB), University of Iowa), for  
673 dividing cells, rabbit anti-phospho-Histone H3 (Ser10) clone MC463 (Millipore Sigma) at 1:250, and for  
674 cilia, mouse-anti-acetylated tubulin (Sigma) at 1:1000. Secondary antibody used was goat-anti-mouse IgG  
675 (H+L) Cross-Adsorbed-Alexa555 (ThermoFisher) at 1:400 and goat-anti-rabbit-HRT 1:100, with TSA-  
676 Alexa488 amplification for the phosphor-Histone H3 antibody. All antibodies were diluted in PBSTx+B.  
677 Anti-SYNORF1 was deposited to the DSHB by E. Buchner (DSHB Hybridoma Product 3C11 (anti-SYNORF1))  
678 (Klagges et al., 1996).

679 Samples were mounted in Vectashield® hard set mounting medium (Vector Laboratories, Burlingame, CA)  
680 and imaged on a Leica SP8 confocal (Leica, Mannheim, Germany) with HyD detector, 488 nm and 552 nm  
681 diode light source, and 10x NA=0.4 (Leica HC PL APO CS2) or 25x water-immersion NA=0.95 (Leica HC  
682 Fluotar L) objectives.

#### 683 Image analysis, data analysis and statistical information

684 Sample sizes were chosen in accordance with standards of the field. Repeat numbers and sample sizes are  
685 reported in the respective figure legends. Animals taken from the same colony unit and treated at the  
686 same time and investigated in parallel are considered technical replicates, while animals from a different  
687 colony unit investigated at a different time represent biological replicates. Animals were randomly  
688 selected out of large colony units and randomly assigned into treatment groups. Data analysis was  
689 performed blinded.

690 All image analysis, measurements and image post-processing were performed in FIJI ImageJ (Rueden et  
691 al., 2017; Schindelin et al., 2012). Data analysis and plotting was done in GraphPad Prism V8.0 (GraphPad,  
692 San Diego, CA). All datapoints are plotted where reasonable, otherwise center and dispersion measures  
693 are defined in the respective figure legends. All data was included in all analyses. All plotted data can be  
694 found in Supplementary Dataset 1.

695 Unless otherwise specified, multiple t-tests with false discovery rate (FDR) approach using the two-stage  
696 step-up method of Benjamini, Krieger and Yekutieli with an FDR = 1 %, not assuming equal SD, was  
697 performed to analyze all datasets. All other datasets were analyzed using a Welsh's two-tailed t-test.  
698 Significance threshold was set to p<0.01. Statistical test data are given in respective Supplementary  
699 Tables.

700

701 **Acknowledgements**

702           The authors would like to thank Anna Kane, Joshua Finkelstein, Alexis Pietak, and all members of  
703 the Levin lab for thoughtful discussions on this project. We thank Nicolas Spitzer, Mansi Shrivastava, and  
704 James Monaghan for critical reading and comments on the manuscript. We thank Junji Morokuma and  
705 Hans Gonzembach for planaria colony maintenance. This research was supported by the Allen Discovery  
706 Center program through The Paul G. Allen Frontiers Group (12171), and by the National Institutes of  
707 Health Research Infrastructure grant NIH S10 OD021624.

708

709 **Author contribution**

710 Conceptualization: Johanna Bischof and Michael Levin

711 Methodology: Johanna Bischof

712 Validation: Johanna Bischof and Margot E. Day

713 Formal Analysis: Johanna Bischof

714 Investigation: Johanna Bischof, Margot E. Day, Kelsie A. Miller, Joshua LaPalme

715 Resources: Michael Levin

716 Data Curation: Johanna Bischof, Margot E. Day

717 Writing – Original Draft Preparation: Johanna Bischof

718 Writing – Review and Editing: Johanna Bischof, Michael Levin, Margot E. Day, Kelsie A. Miller, Joshua  
719 LaPalme

720 Visualization: Johanna Bischof

721 Supervision: Michael Levin

722 Project Administration: Johanna Bischof

723 Funding Acquisition: Michael Levin

724

725 **Competing Interests**

726           The authors declare no competing interests.

727

728

729 **Videos**

730 **Video 1: Movement of a DH planarian at Day 7.** The two heads are not evenly regenerated, and the  
731 more fully regenerated head dominates the movement of the whole animal. Sped up 2x.

732 **Video 2: Movement of a DH planarian at Day 49.** The two heads are evenly regenerated, and  
733 movement is equally controlled by both halves of the animal, leading to frequent stalling. Sped up 2x.

734 **Video 3: Carmine powder flow assay in a single-headed animal.** Single-headed planarian showing  
735 unidirectional flow of the carmine powder across the whole animal. Sped up 20x, 171 frames at 100 ms  
736 frame rate.

737 **Video 4: Position of the collision zone changes over time in DH animals.** Flow in DH animals at Day 7,  
738 Day 14, Day 21, Day 28, Day 35 and Day 42, showing progressive movement of the collision zone across  
739 the posterior half of the animal. Sped up 5x, 26 frames at 100 ms frame rate.

740 **Video 5: Cilia driven flow in animals with internal tissue removal.** Flow in an DH animal following  
741 internal tissue removal at Day 7, flow imaged at Day 28. Asterisk marks site of healed wound. Sped up  
742 5x, 26 frames at 100 ms frame rate.

743 **Video 6: Serotonin treatment blocks flow.** A) Untreated DH and B) DH treated with 500  $\mu$ M Serotonin  
744 at Day 14. Sped up 10x, 101 frames at 100 ms frame rate.

745 **Video 7: Removal of heads impacts repatterning speed.** A) Control DH, B) DH with primary head  
746 removed showing further advanced collision zone compared to control, C) DH with secondary head  
747 removed showing less advanced collision zone compared to control, D) DH with both heads removed  
748 showing equally less advanced collision zone compared to control at Day 35. Sped up 5x, 26 frames at  
749 100 ms frame rate.

750 **Video 8: Continuous removal of primary head allows repatterning across the midpoint.** DH with its  
751 primary head continuously removed with the collision zone positioned across the midline, as visible  
752 when the animal is fully extended, at Day 56. Sped up 5x, 51 frames at 100 ms frame rate.

753 **Video 9: Removal of head in a mature DH does not reposition the collision zone.** A) DH animal at Day  
754 49 before treatment. B) DH animal irradiated and with one head removed at Day 49, imaged at Day 63.  
755 Sped up 5x, 51 frames at 100 ms frame rate.

756 **Video 10: Removal of head in SH animal does not impact ciliary orientation.** A) SH animal before  
757 treatment showing unidirectional flow. B) Ciliary driven flow in the same animal following irradiation,  
758 removal of head and incubation for 21 days. Sped up 10x, 82 frames at 100 ms frame rate.

759 **Video 11: Cilia-driven flow in an animal with a lateral cut.** Animal cut laterally following irradiation at  
760 Day 7 in the secondary half of the body, showing collision zone positioned behind the cut. Sped up 5x,  
761 51 frames at 100 ms frame rate.

762

763

764

765 **Supplemental Figures**

A

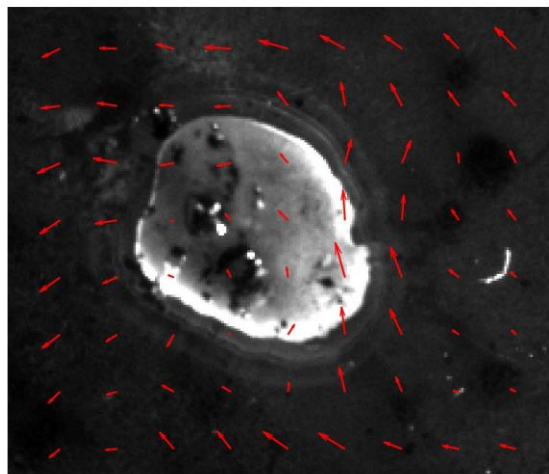

3% Ethanol

B

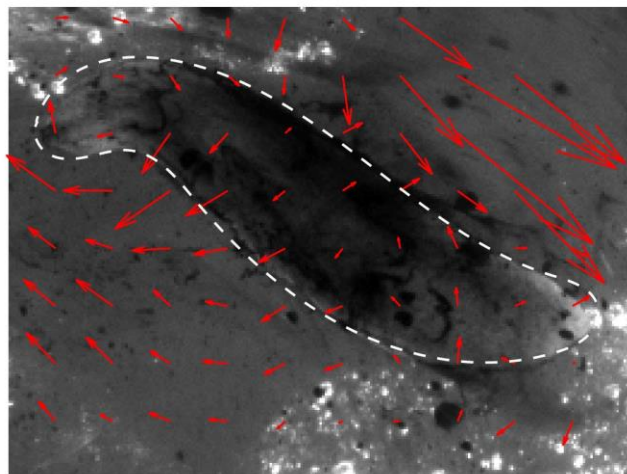

Ice

766  
767 **Figure S1: Controls for carmine-powder flow assay.** A) Animal treated with 3% Ethanol for 1 hour before  
768 testing shows no flow, as visualized by tracking of particle movement using particle image velocimetry  
769 (PIV) (red arrows). B) Animal maintained on ice to reduce temperature shows no flow along the animal  
770 axis (outlines by dashed line), as visualized by tracking of particle movement by PIV (red arrows).

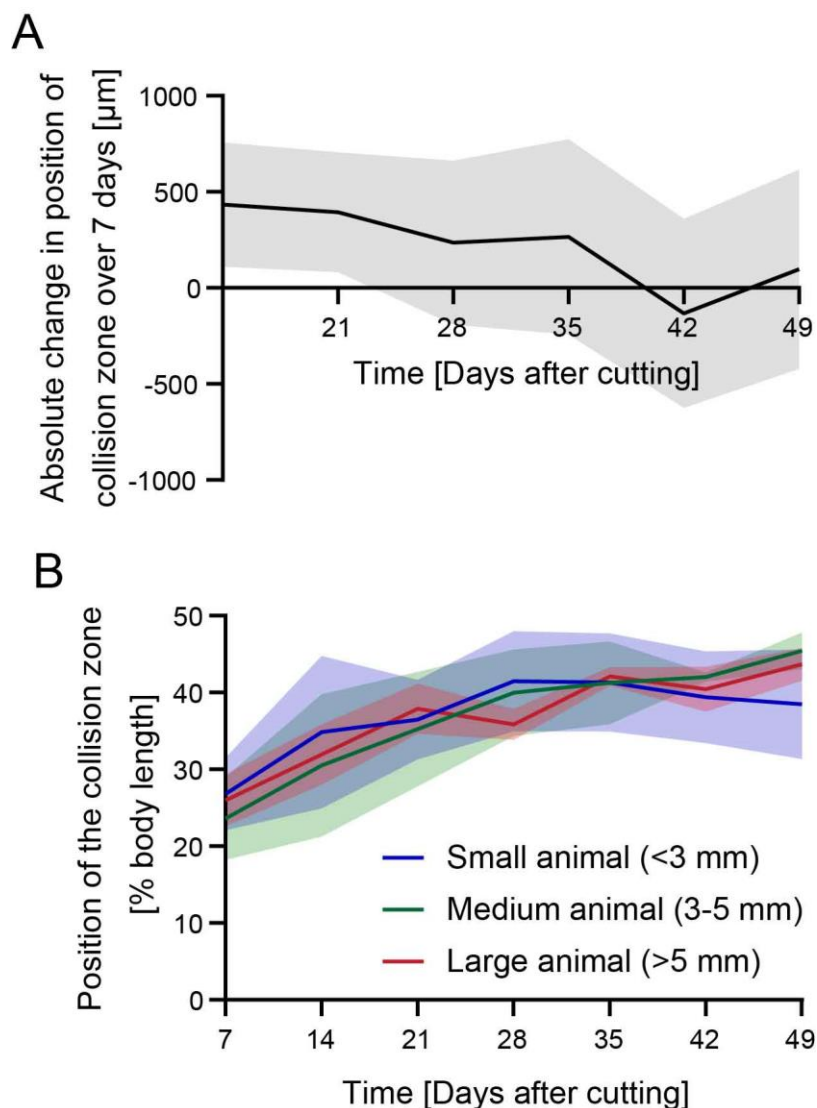

771  
772 **Figure S2: Progression of cilia reorientation.** A) The absolute change in the position of the collision zone  
773 is relatively even from Day 7 until Day 35, when it slows down and stalls following D42. N=24. B)  
774 Reorientation of the cilia position occurs at the same relative speed in animals of different sizes,  
775 suggesting scaling of the repatterning process. N=4. Plotted is mean of all samples, with standard  
776 deviation represented as shaded area.

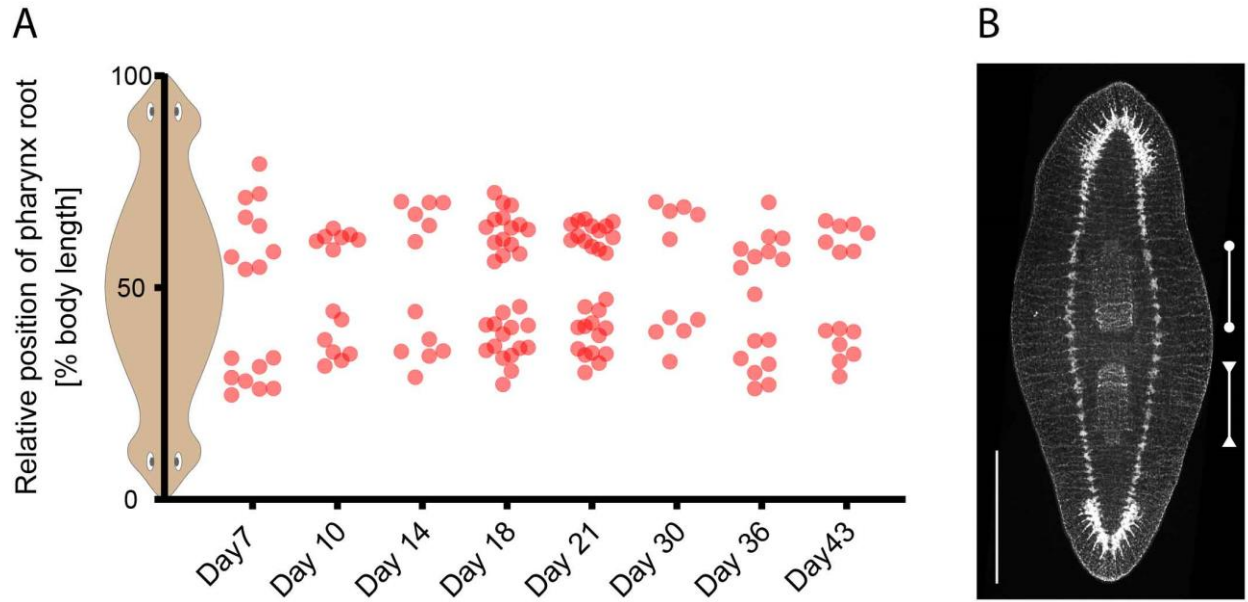

777

778 **Figure S3: Position of the pharynges in double-headed animals at different ages.** A) Position of root of  
779 the primary and secondary pharynx in DH animals at different timepoints from Day 7 to Day 43, plotted  
780 as position along the body length of the double-headed animal. B) Synapsin antibody stain in a double-  
781 headed animal at Day 14, showing the pharynx in the primary half of the animal (bar with circular ends)  
782 and the pharynx in the secondary half of the animal (bar with triangular ends), illustrating position of the  
783 two structures. Scale bar 1mm.

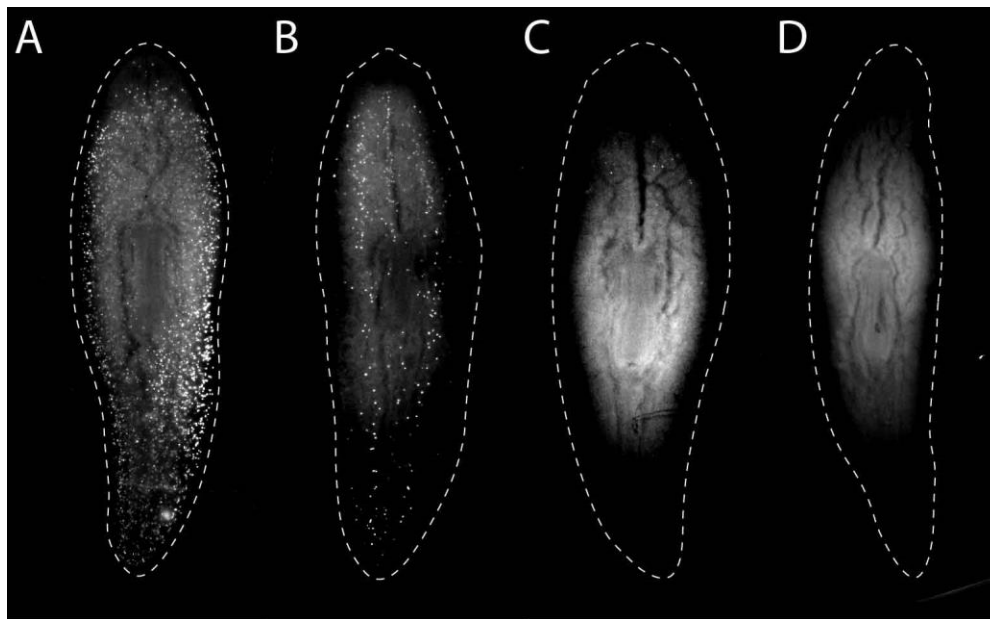

784

785 **Figure S4: Depletion of dividing cells following irradiation.** A) Unirradiated control animal, and animals  
786 B) 1 day, C) 3 days and D) 7 days after irradiation with 200 Gy. Stained with anti-phospho-Histone H3  
787 (Ser10).

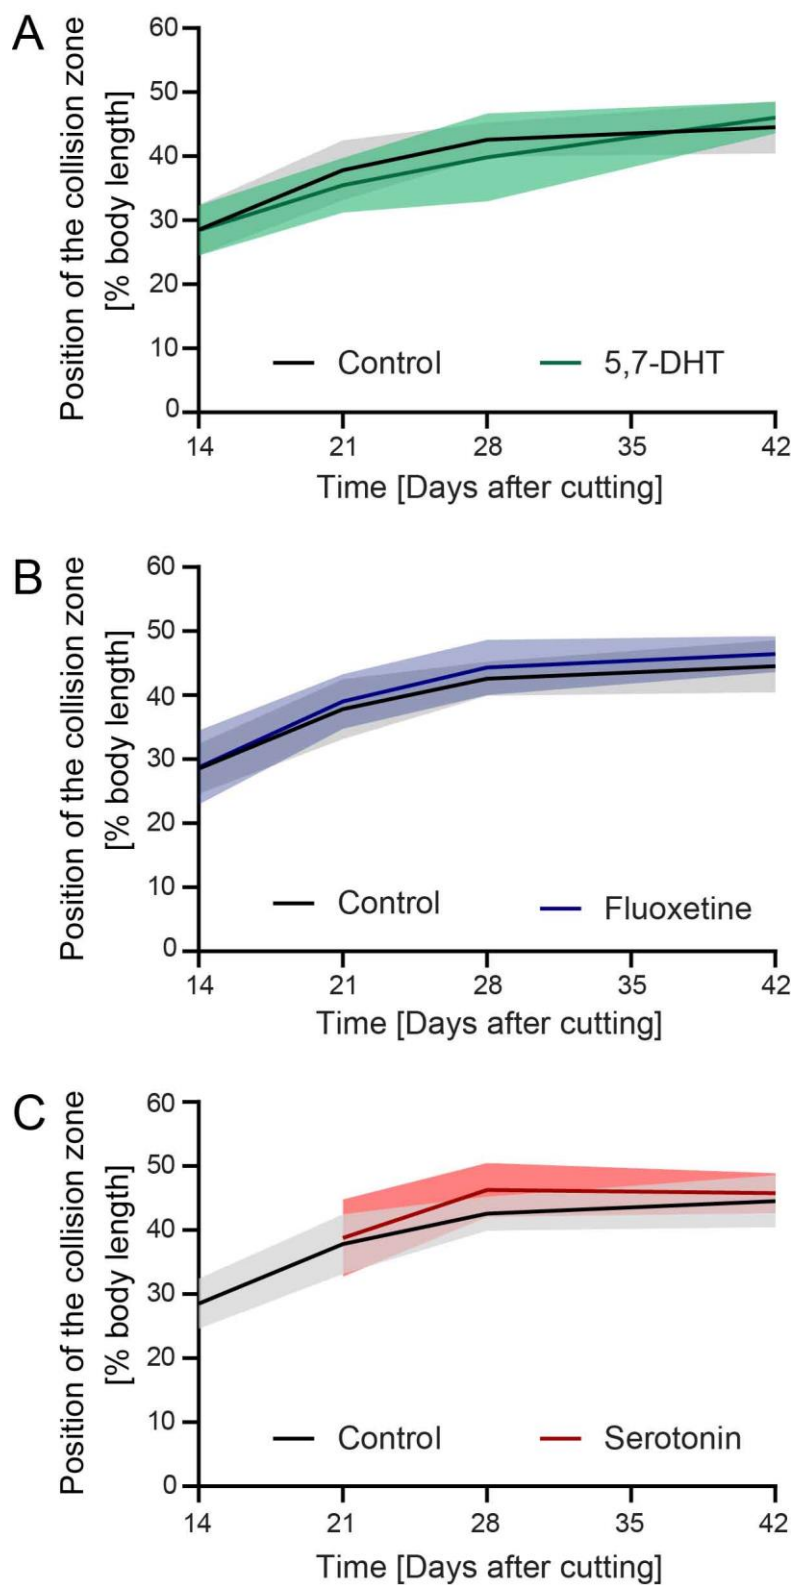

788

789 **Figure S5: Treatments disrupting serotonergic neurons do not affect cilia reorientation.** A) DHs treated  
790 continuously from Day 7 onwards with 75  $\mu$ M 5,7-Dihydroxytryptamine (5,7-DHT) (green), a serotonergic  
791 neurotoxin, showed no difference in repatterning speed compared to controls (black). B) DHs treated

792 continuously from Day 7 onwards with 2  $\mu$ M Fluoxetine (blue), a serotonin reuptake inhibitor, showed no  
793 difference in repatterning speed compared to controls (black). C) DHs treated from Day 7 till Day 14 with  
794 500  $\mu$ M serotonin (red) showed no difference in repatterning speed compared to controls (black) after  
795 washout of the drug. No flow was detectable during serotonin incubation. N=12. Plotted is mean of all  
796 samples, with standard deviation as shaded area, all experiments with their age-matched controls.

**A**

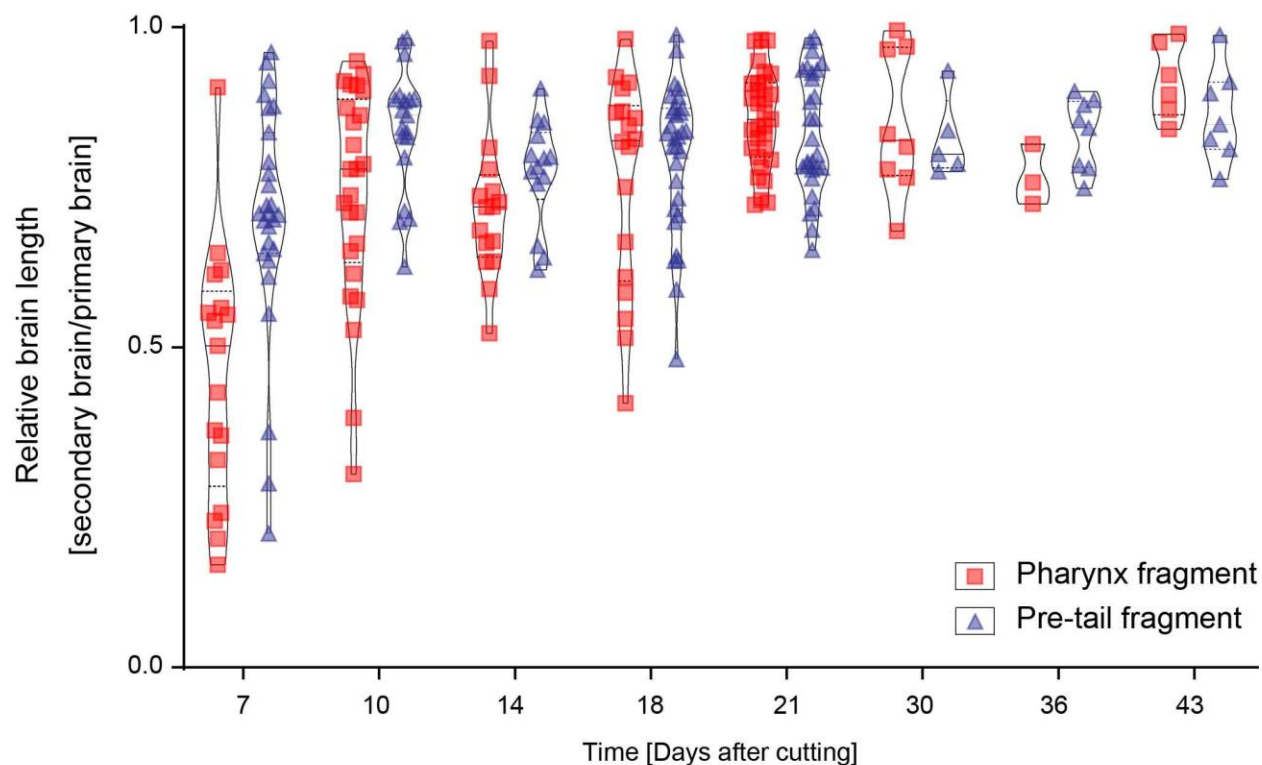

**B**

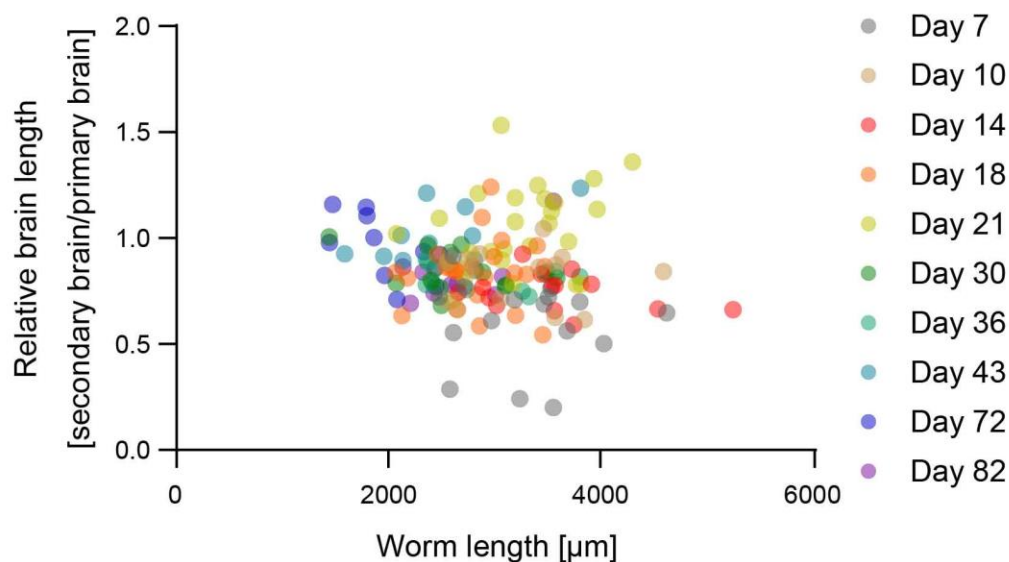

797



798 **Figure S6: Brain size differences in DHs do not correlate with fragment origin or size of animal.** A)  
799 Relative size of the brain in the primary and secondary head in DHs generated either from pharynx (red  
800 square) or pre-tail fragments (blue triangle) from Day 7 to Day 43, showing no pronounced difference in  
801 the distribution of the data at each timepoint. B) Relative brain length of the primary and secondary brain  
802 over time plotted against worm size, showing no correlation with worm length.

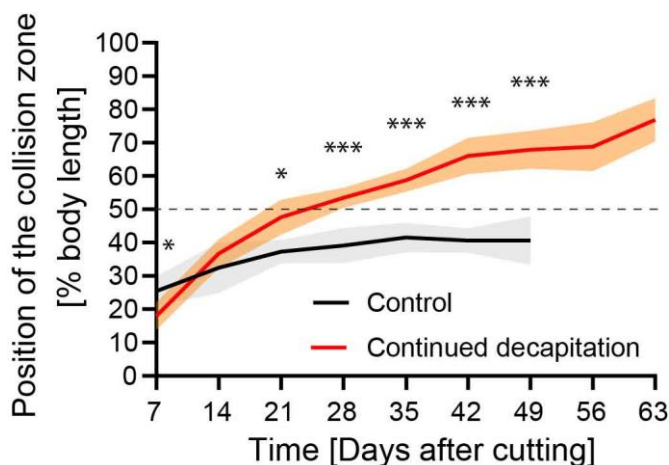

803  
804 **Figure S7: Serial removal of the primary head allows repatterning across the midline.** Repatterning in  
805 animals which had their primary head removed every second day after Day 7 (red), compared to controls  
806 (black), showing significant difference in repatterning speed and advancement of collision zone far above  
807 the 50% boundary. N=12. Plotted is mean of all samples, with standard deviation as shaded area, all  
808 experiments with their age-matched controls.

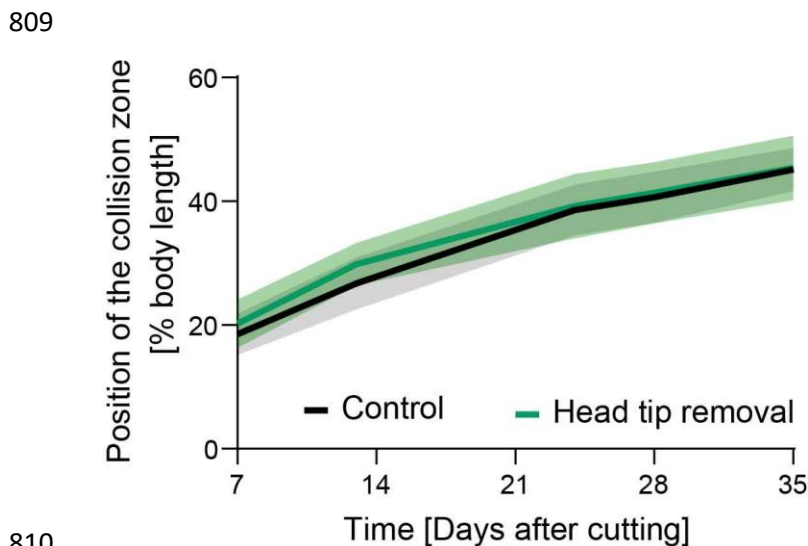

810  
811 **Figure S8: Removal of the head tip does not impact repatterning.** DHs irradiated and with the head tip  
812 of the secondary head removed at Day 7 showed no difference in repatterning speed compared to  
813 controls. N=12. Plotted is mean of all samples, with standard deviation as shaded area, all experiments  
814 with their age-matched controls.

815

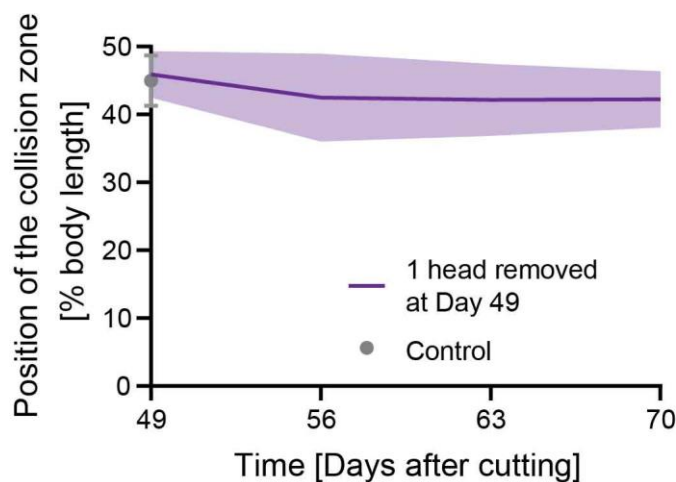

816

817 **Figure S9: Removal of one head in mature DHs does not impact position of collision zone.** Position of  
818 the collision zone does not change in DHs, which had one of their heads removed at Day 49 following  
819 irradiation, tracked over 21 days following head removal. N=12. Plotted is mean of all samples, with  
820 standard deviation as shaded area. Grey point with error bars represents control sample at Day 49.

821

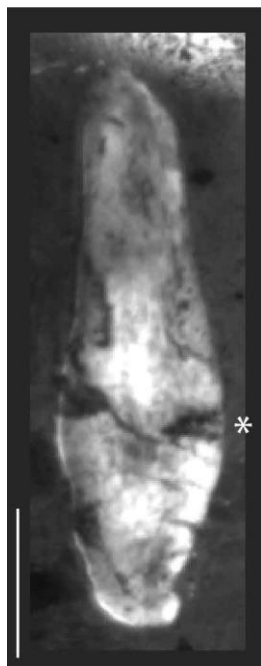

822

823 **Figure S10: DHs with one side of the secondary head removed show no significant angling of the collision**  
824 **zone.** DHs were irradiated and half of the head was removed laterally at Day 7 and flow was tracked.  
825 Image of worm at Day 28.

826

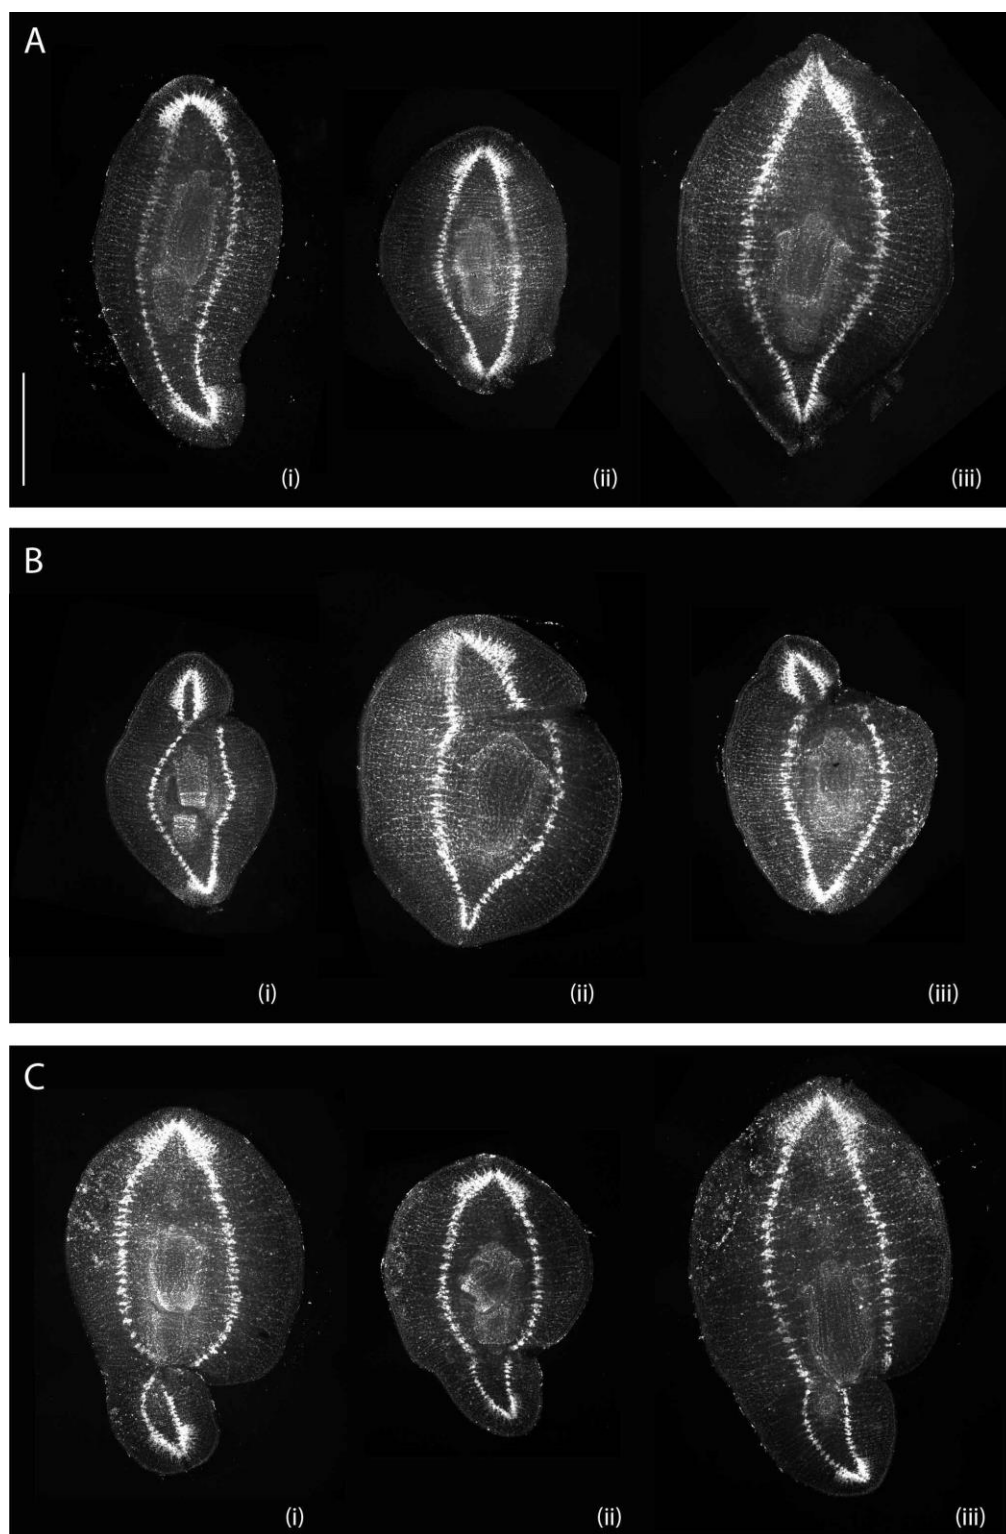

827

828 **Figure S11: Further examples of laterally cut animals stained with synapsin antibody.** A) Control animals.  
829 B) DHs with cut underneath the primary head, showing diversity of cut and healing outcomes. C) DHs with  
830 cut underneath the secondary head. All animals were irradiated and cut at Day 7 and fixed at Day 28. Scale  
831 bar 1 mm.

832 **Supplementary Tables**

833 **Supplementary Table 1: Internal tissue removal, statistical analysis data**

| Time point | P value  | Mean of Control | Mean of Large Wormholes | Difference | SE of difference | t ratio | df    | q value  |
|------------|----------|-----------------|-------------------------|------------|------------------|---------|-------|----------|
| Day 21     | 0.943328 | 34.78           | 34.99                   | -0.2128    | 2.953            | 0.07209 | 18.00 | 0.952761 |
| Day 32     | 0.406620 | 41.80           | 43.35                   | -1.556     | 1.831            | 0.8498  | 18.00 | 0.616029 |
| Day 39     | 0.230430 | 46.80           | 45.47                   | 1.324      | 1.064            | 1.244   | 17.00 | 0.616029 |

834

835 **Supplementary Table 2: Irradiation, statistical analysis data**

| Time point | P value  | Mean of Control | Mean of Irradiated animals | Difference | SE of difference | t ratio | df    | q value  |
|------------|----------|-----------------|----------------------------|------------|------------------|---------|-------|----------|
| Day 7      | 0.000332 | 19.22           | 13.66                      | 5.563      | 1.311            | 4.245   | 22.00 | 0.001677 |
| Day 14     | 0.928706 | 26.33           | 26.54                      | -0.2104    | 2.324            | 0.09055 | 21.00 | 0.781661 |
| Day 21     | 0.606377 | 32.11           | 33.54                      | -1.425     | 2.724            | 0.5231  | 21.00 | 0.765551 |
| Day 28     | 0.141580 | 35.65           | 38.31                      | -2.652     | 1.736            | 1.527   | 21.00 | 0.238327 |
| Day 35     | 0.889665 | 40.95           | 40.71                      | 0.2446     | 1.737            | 0.1408  | 17.00 | 0.781661 |
| Day 42     | 0.029429 | 41.74           | 36.69                      | 5.048      | 2.082            | 2.425   | 14.00 | 0.074308 |

836

837 **Supplementary Table 3: Short term ethanol treatment, statistical analysis data**

|        | P value  | Mean of Control | Mean of 1h Ethanol | Difference | SE of difference | t ratio | df    | q value  |
|--------|----------|-----------------|--------------------|------------|------------------|---------|-------|----------|
| Day 7  | 0.002248 | 25.42           | 18.37              | 7.057      | 2.029            | 3.478   | 21.00 | 0.015891 |
| Day 14 | 0.293892 | 32.44           | 29.32              | 3.121      | 2.899            | 1.077   | 21.00 | 0.478683 |
| Day 21 | 0.362489 | 37.33           | 34.53              | 2.801      | 2.975            | 0.9413  | 14.00 | 0.478683 |
| Day 28 | 0.088478 | 39.11           | 42.58              | -3.468     | 1.941            | 1.786   | 21.00 | 0.245426 |
| Day 35 | 0.989495 | 41.54           | 41.57              | -0.02368   | 1.776            | 0.01333 | 20.00 | 0.999390 |
| Day 42 | 0.104141 | 40.63           | 43.15              | -2.526     | 1.484            | 1.703   | 20.00 | 0.245426 |

838

839

840

841 **Supplementary Table 4: 5,7-Dihydroxytryptamine treatment, statistical analysis data**

|        | P value  | Mean of Control | Mean of DHT animals | Difference | SE of difference | t ratio | df    | q value  |
|--------|----------|-----------------|---------------------|------------|------------------|---------|-------|----------|
| Day 14 | 0.947371 | 28.54           | 28.43               | 0.1089     | 1.630            | 0.06680 | 21.00 | 0.956845 |
| Day 21 | 0.209620 | 37.82           | 35.46               | 2.361      | 1.827            | 1.292   | 22.00 | 0.390030 |
| Day 28 | 0.209798 | 42.57           | 39.83               | 2.737      | 2.119            | 1.292   | 22.00 | 0.390030 |
| Day 42 | 0.289626 | 44.54           | 46.02               | -1.481     | 1.365            | 1.085   | 22.00 | 0.390030 |

842

843 **Supplementary Table 5: Fluoxetine treatment, statistical analysis data**

|        | P value  | Mean of Control | Mean of Fluoxetine animals | Difference | SE of difference | t ratio | df    | q value  |
|--------|----------|-----------------|----------------------------|------------|------------------|---------|-------|----------|
| Day 14 | 0.927182 | 28.54           | 28.73                      | -0.1919    | 2.075            | 0.09249 | 21.00 | 0.936454 |
| Day 21 | 0.510771 | 37.82           | 39.03                      | -1.215     | 1.817            | 0.6685  | 22.00 | 0.687838 |
| Day 28 | 0.246354 | 42.57           | 44.31                      | -1.745     | 1.465            | 1.191   | 22.00 | 0.497635 |
| Day 42 | 0.199389 | 44.54           | 46.42                      | -1.876     | 1.418            | 1.323   | 22.00 | 0.497635 |

844

845 **Supplementary Table 6: Serotonin treatment, statistical analysis data**

|        | P value  | Mean of Control | Mean of Serotonin animals | Difference | SE of difference | t ratio | df    | q value  |
|--------|----------|-----------------|---------------------------|------------|------------------|---------|-------|----------|
| Day 21 | 0.685684 | 37.82           | 38.80                     | -0.9823    | 2.388            | 0.4113  | 18.00 | 0.692541 |
| Day 28 | 0.026119 | 42.57           | 46.27                     | -3.709     | 1.530            | 2.424   | 18.00 | 0.052761 |
| Day 42 | 0.484950 | 44.54           | 45.75                     | -1.211     | 1.698            | 0.7131  | 18.00 | 0.653066 |

846

847 **Supplementary Table 7: Cytochalasin D treatment, statistical analysis data**

|        | P value  | Mean of Control | Mean of CytoD animals | Difference | SE of difference | t ratio | df    | q value  |
|--------|----------|-----------------|-----------------------|------------|------------------|---------|-------|----------|
| Day 7  | 0.167679 | 18.87           | 16.72                 | 2.152      | 1.509            | 1.427   | 22.00 | 0.225808 |
| Day 14 | 0.899292 | 25.88           | 25.65                 | 0.2237     | 1.746            | 0.1281  | 21.00 | 0.605523 |

|        |          |       |       |         |        |        |       |          |
|--------|----------|-------|-------|---------|--------|--------|-------|----------|
| Day 21 | 0.000235 | 33.06 | 37.19 | -4.138  | 1.068  | 3.873  | 72.00 | 0.000474 |
| Day 28 | 0.000004 | 37.76 | 42.24 | -4.478  | 0.9002 | 4.974  | 78.00 | 0.000015 |
| Day 35 | 0.880184 | 40.81 | 40.52 | 0.2898  | 1.898  | 0.1527 | 20.00 | 0.605523 |
| Day 42 | 0.882505 | 41.65 | 41.85 | -0.1958 | 1.308  | 0.1497 | 20.00 | 0.605523 |

848

849 **Supplementary Table 8: Primary head removal, statistical analysis data**

|        | P value  | Mean of Control | Mean of Primary decapitation animals | Difference | SE of difference | t ratio | df    | q value  |
|--------|----------|-----------------|--------------------------------------|------------|------------------|---------|-------|----------|
| Day 7  | 0.677534 | 19.22           | 19.99                                | -0.7705    | 1.828            | 0.4214  | 22.00 | 0.114052 |
| Day 14 | 0.007399 | 26.33           | 33.10                                | -6.770     | 2.284            | 2.964   | 21.00 | 0.001495 |
| Day 21 | 0.000565 | 32.11           | 39.33                                | -7.222     | 1.780            | 4.058   | 21.00 | 0.000285 |
| Day 28 | 0.001164 | 35.65           | 44.55                                | -8.897     | 2.351            | 3.784   | 20.00 | 0.000392 |
| Day 35 | 0.000030 | 40.95           | 50.15                                | -9.198     | 1.665            | 5.526   | 18.00 | 0.000031 |
| Day 42 | 0.003744 | 41.74           | 51.19                                | -9.451     | 2.816            | 3.357   | 17.00 | 0.000945 |

850

851 **Supplementary Table 9: Secondary head removal, statistical analysis data**

|        | P value  | Mean of Control | Mean of Secondary decapitation animals | Difference | SE of difference | t ratio | df    | q value  |
|--------|----------|-----------------|----------------------------------------|------------|------------------|---------|-------|----------|
| Day 7  | 0.662416 | 19.22           | 18.61                                  | 0.6148     | 1.389            | 0.4425  | 22.00 | 0.223013 |
| Day 14 | 0.026698 | 26.33           | 21.74                                  | 4.594      | 1.928            | 2.383   | 21.00 | 0.010786 |
| Day 21 | 0.001300 | 32.11           | 26.32                                  | 5.787      | 1.560            | 3.709   | 21.00 | 0.000875 |
| Day 28 | 0.001977 | 35.65           | 29.76                                  | 5.896      | 1.669            | 3.532   | 21.00 | 0.000998 |
| Day 35 | 0.000118 | 40.95           | 31.50                                  | 9.448      | 1.959            | 4.823   | 19.00 | 0.000239 |
| Day 42 | 0.000296 | 41.74           | 34.88                                  | 6.864      | 1.467            | 4.681   | 15.00 | 0.000299 |

852

853 **Supplementary Table 10: Both head removal, statistical analysis data**

|        | P value  | Mean of Control | Mean of Double decapitation animals | Difference | SE of difference | t ratio | df    | q value  |
|--------|----------|-----------------|-------------------------------------|------------|------------------|---------|-------|----------|
| Day 7  | 0.565658 | 19.22           | 18.09                               | 1.133      | 1.942            | 0.5832  | 22.00 | 0.380876 |
| Day 14 | 0.018288 | 26.33           | 20.43                               | 5.902      | 2.297            | 2.570   | 20.00 | 0.018470 |

|        |          |       |       |       |       |       |       |          |
|--------|----------|-------|-------|-------|-------|-------|-------|----------|
| Day 21 | 0.141739 | 32.11 | 28.48 | 3.629 | 2.377 | 1.527 | 21.00 | 0.114525 |
| Day 28 | 0.017421 | 35.65 | 30.76 | 4.892 | 1.887 | 2.592 | 20.00 | 0.018470 |
| Day 35 | 0.000022 | 40.95 | 29.39 | 11.56 | 2.103 | 5.499 | 20.00 | 0.000045 |
| Day 42 | 0.000002 | 41.74 | 28.94 | 12.80 | 1.736 | 7.377 | 15.00 | 0.000009 |

854

855 **Supplementary Table 11: Continuous decapitation, statistical analysis data**

|        | P value   | Mean of Control | Mean of Continued decapitation animals | Difference | SE of difference | t ratio | df    | q value   |
|--------|-----------|-----------------|----------------------------------------|------------|------------------|---------|-------|-----------|
| Day 7  | 0.000456  | 25.42           | 17.98                                  | 7.441      | 1.794            | 4.148   | 21.00 | 0.000092  |
| Day 14 | 0.107628  | 32.44           | 36.69                                  | -4.254     | 2.536            | 1.677   | 22.00 | 0.015529  |
| Day 21 | 0.001225  | 37.33           | 47.62                                  | -10.29     | 2.590            | 3.973   | 15.00 | 0.000206  |
| Day 28 | <0.000001 | 39.11           | 53.44                                  | -14.32     | 1.748            | 8.194   | 22.00 | <0.000001 |
| Day 35 | <0.000001 | 41.54           | 58.67                                  | -17.12     | 1.672            | 10.24   | 21.00 | <0.000001 |
| Day 42 | <0.000001 | 40.63           | 66.03                                  | -25.40     | 1.884            | 13.48   | 22.00 | <0.000001 |
| Day 49 | <0.000001 | 40.64           | 67.86                                  | -27.22     | 2.650            | 10.27   | 22.00 | <0.000001 |

856

857 **Supplementary Table 12: Head tip removal, statistical analysis data**

|        | P value  | Mean of Control | Mean of Head tip removal animals | Difference | SE of difference | t ratio | df    | q value  |
|--------|----------|-----------------|----------------------------------|------------|------------------|---------|-------|----------|
| Day 7  | 0.264776 | 18.50           | 20.20                            | -1.696     | 1.482            | 1.144   | 22.00 | 0.668559 |
| Day 13 | 0.058891 | 26.71           | 29.83                            | -3.121     | 1.566            | 1.992   | 22.00 | 0.297401 |
| Day 24 | 0.749590 | 38.57           | 39.18                            | -0.6187    | 1.914            | 0.3232  | 22.00 | 0.900474 |
| Day 28 | 0.711581 | 40.63           | 41.34                            | -0.7093    | 1.893            | 0.3748  | 21.00 | 0.900474 |
| Day 35 | 0.891558 | 45.10           | 45.37                            | -0.2672    | 1.935            | 0.1381  | 20.00 | 0.900474 |

858

859 **Supplementary Table 13: Mature DH decapitation, statistical analysis data**

|                |                          |
|----------------|--------------------------|
| Table Analyzed | DH decapitated at Day 49 |
| Column C       | Day 70                   |
| vs.            | vs.                      |
| Column B       | Day 49                   |

|                                                |                   |
|------------------------------------------------|-------------------|
| <b>Unpaired t test with Welch's correction</b> |                   |
| P value                                        | 0.0483            |
| P value summary                                | *                 |
| Significantly different (P < 0.01)?            | No                |
| One- or two-tailed P value?                    | Two-tailed        |
| Welch-corrected t, df                          | t=2.146, df=15.32 |
| <b>How big is the difference?</b>              |                   |
| Mean of column B                               | 45.89             |
| Mean of column C                               | 42.24             |
| Difference between means (C - B) ± SEM         | -3.650 ± 1.701    |
| 99% confidence interval                        | -8.646 to 1.346   |
| R squared (eta squared)                        | 0.2311            |
| <b>F test to compare variances</b>             |                   |
| F, DF <sub>n</sub> , DF <sub>d</sub>           | 1.474, 8, 11      |
| P value                                        | 0.5388            |
| P value summary                                | ns                |
| Significantly different (P < 0.01)?            | No                |
| <b>Data analyzed</b>                           |                   |
| Sample size, column B                          | 12                |
| Sample size, column C                          | 9                 |

860

861 **Supplementary Table 14: Half-head lateral removal, statistical analysis data**

|        | P value  | Mean of Control | Mean of HH lateral animals | Difference | SE of difference | t ratio | df    | q value  |
|--------|----------|-----------------|----------------------------|------------|------------------|---------|-------|----------|
| Day 7  | 0.010864 | 18.09           | 21.84                      | -3.752     | 1.349            | 2.782   | 22.00 | 0.002743 |
| Day 14 | 0.000154 | 30.92           | 22.84                      | 8.082      | 1.773            | 4.559   | 22.00 | 0.000063 |
| Day 21 | 0.000187 | 36.43           | 29.25                      | 7.186      | 1.604            | 4.480   | 22.00 | 0.000063 |
| Day 28 | 0.000108 | 39.00           | 29.22                      | 9.774      | 2.057            | 4.752   | 21.00 | 0.000063 |

862

863 **Supplementary Table 15: Half-head removal perpendicular, statistical analysis data**



|        | P value   | Mean of Control | Mean of HH perpendicular animals | Difference | SE of difference | t ratio | df    | q value   |
|--------|-----------|-----------------|----------------------------------|------------|------------------|---------|-------|-----------|
| Day 7  | 0.720203  | 18.50           | 18.99                            | -0.4920    | 1.356            | 0.3628  | 22.00 | 0.290962  |
| Day 13 | 0.185634  | 26.71           | 24.50                            | 2.208      | 1.616            | 1.366   | 22.00 | 0.093745  |
| Day 24 | 0.000062  | 38.57           | 29.50                            | 9.066      | 1.838            | 4.934   | 22.00 | 0.000042  |
| Day 28 | 0.000007  | 40.63           | 30.56                            | 10.07      | 1.731            | 5.817   | 22.00 | 0.000008  |
| Day 35 | <0.000001 | 45.10           | 32.18                            | 12.92      | 1.359            | 9.508   | 20.00 | <0.000001 |

864

865 **Supplementary Table 16: Relative brain size in irradiated and untreated animals, statistical analysis**  
 866 **data**

| Table Analyzed                                 | Relative brain size | Relative brain size |
|------------------------------------------------|---------------------|---------------------|
| Column M                                       | irradiated Day 28   | irradiated Day 28   |
| vs.                                            | vs.                 | vs.                 |
| Column F                                       | Day 21              | Day 30              |
| <b>Unpaired t test with Welch's correction</b> |                     |                     |
| P value                                        | 0.0002              | 0.0005              |
| P value summary                                | ***                 | ***                 |
| Significantly different (P < 0.01)?            | Yes                 | Yes                 |
| One- or two-tailed P value?                    | Two-tailed          | Two-tailed          |
| Welch-corrected t, df                          | t=4.595, df=19.41   | t=3.919, df=27.10   |
| <b>How big is the difference?</b>              |                     |                     |
| Mean of column F                               | 0.8463              | 0.8412              |
| Mean of column M                               | 0.6466              | 0.6466              |
| Difference between means (M - F) ± SEM         | -0.1997 ± 0.04346   | -0.1945 ± 0.04965   |
| 95% confidence interval                        | -0.2905 to -0.1089  | -0.2964 to -0.09269 |
| R squared (eta squared)                        | 0.5210              | 0.3617              |

| <b>F test to compare variances</b>  |               |               |
|-------------------------------------|---------------|---------------|
| F, DFn, Dfd                         | 4.407, 17, 58 | 3.503, 17, 12 |
| P value                             | <0.0001       | 0.0322        |
| P value summary                     | ****          | *             |
| Significantly different (P < 0.05)? | Yes           | Yes           |
| <b>Data analyzed</b>                |               |               |
| Sample size, column F               | 59            | 13            |
| Sample size, column M               | 18            | 18            |

867

868 **Supplementary Table 17: Head bisection, statistical analysis data**

|        | P value   | Mean of Control | Mean of Head bisection animals | Difference | SE of difference | t ratio | df    | q value   |
|--------|-----------|-----------------|--------------------------------|------------|------------------|---------|-------|-----------|
| Day 7  | 0.666008  | 18.50           | 19.05                          | -0.5484    | 1.253            | 0.4375  | 22.00 | 0.134534  |
| Day 13 | 0.002632  | 26.71           | 20.05                          | 6.662      | 1.965            | 3.390   | 22.00 | 0.000665  |
| Day 24 | 0.000001  | 38.57           | 28.39                          | 10.17      | 1.559            | 6.523   | 22.00 | <0.000001 |
| Day 28 | <0.000001 | 40.63           | 27.33                          | 13.30      | 1.801            | 7.382   | 22.00 | <0.000001 |
| Day 35 | <0.000001 | 45.10           | 28.46                          | 16.64      | 1.900            | 8.760   | 19.00 | <0.000001 |

869

870 **Supplementary Table 18: Lateral cut at primary head, statistical analysis data**

|        | P value  | Mean of Control | Mean of cut at 1st head animals | Difference | SE of difference | t ratio | df    | q value  |
|--------|----------|-----------------|---------------------------------|------------|------------------|---------|-------|----------|
| Day 7  | 0.143374 | 19.76           | 17.25                           | 2.512      | 1.655            | 1.518   | 22.00 | 0.086885 |
| Day 14 | 0.002353 | 27.34           | 30.84                           | -3.503     | 1.088            | 3.220   | 46.00 | 0.005497 |
| Day 21 | 0.007365 | 33.29           | 36.72                           | -3.435     | 1.224            | 2.807   | 45.00 | 0.007439 |
| Day 28 | 0.003628 | 39.22           | 43.97                           | -4.755     | 1.543            | 3.081   | 42.00 | 0.005497 |
| Day 35 | 0.141438 | 42.56           | 45.67                           | -3.109     | 2.003            | 1.552   | 15.00 | 0.086885 |

871

872 **Supplementary Table 19: Lateral cut at secondary head, statistical analysis data**

|  | P value | Mean of Control | Mean of cut at 2nd head animals | Difference | SE of difference | t ratio | df | q value |
|--|---------|-----------------|---------------------------------|------------|------------------|---------|----|---------|
|--|---------|-----------------|---------------------------------|------------|------------------|---------|----|---------|

|        |           |       |       |         |       |        |       |           |
|--------|-----------|-------|-------|---------|-------|--------|-------|-----------|
| Day 7  | 0.894110  | 19.76 | 19.96 | -0.1972 | 1.465 | 0.1347 | 22.00 | 0.361220  |
| Day 14 | 0.018651  | 27.34 | 24.60 | 2.738   | 1.121 | 2.443  | 44.00 | 0.009419  |
| Day 21 | 0.000153  | 33.29 | 28.33 | 4.951   | 1.200 | 4.127  | 46.00 | 0.000154  |
| Day 28 | <0.000001 | 39.22 | 29.24 | 9.974   | 1.351 | 7.385  | 46.00 | <0.000001 |
| Day 35 | 0.000335  | 42.56 | 30.81 | 11.75   | 2.663 | 4.414  | 18.00 | 0.000226  |

873

874 **Supplementary Table 20: Lateral cut at different positions along the body axis, statistical analysis data**

| Column B                                       | Cut at 2nd head     | Cut at 25 %         | Cut at 50%         | Cut to midline       |
|------------------------------------------------|---------------------|---------------------|--------------------|----------------------|
| vs.                                            | vs.                 | vs.                 | vs.                | vs.                  |
| Column A                                       | Control             | Control             | Control            | Control              |
|                                                |                     |                     |                    |                      |
| <b>Unpaired t test with Welch's correction</b> |                     |                     |                    |                      |
| P value                                        | <0.0001             | 0.3615              | <0.0001            | 0.0015               |
| P value summary                                | ****                | ns                  | ****               | **                   |
| Significantly different (P < 0.01)?            | Yes                 | No                  | Yes                | Yes                  |
| One- or two-tailed P value?                    | Two-tailed          | Two-tailed          | Two-tailed         | Two-tailed           |
| Welch-corrected t, df                          | t=9.297, df=23.88   | t=0.9461, df=12.88  | t=5.283, df=22.91  | t=3.607, df=22.36    |
|                                                |                     |                     |                    |                      |
| <b>How big is the difference?</b>              |                     |                     |                    |                      |
| Mean of column A                               | 0.3178              | 0.3178              | 0.3178             | 0.3178               |
| Mean of column B                               | 0.2243              | 0.3037              | 0.3745             | 0.2652               |
| Difference between means (B - A) ± SEM         | -0.09358 ± 0.01007  | -0.01419 ± 0.01499  | 0.05665 ± 0.01072  | -0.05263 ± 0.01459   |
| 95% confidence interval                        | -0.1144 to -0.07280 | -0.04661 to 0.01824 | 0.03446 to 0.07884 | -0.08286 to -0.02240 |
| R squared (eta squared)                        | 0.7835              | 0.06499             | 0.5491             | 0.3679               |
|                                                |                     |                     |                    |                      |
| <b>F test to compare variances</b>             |                     |                     |                    |                      |
| F, DFn, Dfd                                    | 2.303, 15, 9        | 4.413, 9, 9         | 2.654, 14, 9       | 7.014, 16, 9         |

|                                     |        |        |        |        |
|-------------------------------------|--------|--------|--------|--------|
| P value                             | 0.2083 | 0.0375 | 0.1449 | 0.0056 |
| P value summary                     | ns     | *      | ns     | **     |
| Significantly different (P < 0.05)? | No     | Yes    | No     | Yes    |
|                                     |        |        |        |        |
| <b>Data analyzed</b>                |        |        |        |        |
| Sample size, column A               | 10     | 10     | 10     | 10     |
| Sample size, column B               | 16     | 10     | 15     | 17     |

875

876 **Supplementary Table 21: Regenerative outcomes in DHs of different ages and cutting planes,**  
 877 **statistical analysis data**

|                                      | P value   | Mean of new DH | Mean of old DH | Difference | SE of difference | t ratio | df    | q value   |
|--------------------------------------|-----------|----------------|----------------|------------|------------------|---------|-------|-----------|
| 2nd decapitation                     | 0.744677  | 95.50          | 98.25          | -2.750     | 8.372            | 0.3285  | 32.00 | 0.300850  |
| 1/4 body length cut - primary side   | <0.000001 | 31.75          | 86.75          | -55.00     | 8.372            | 6.570   | 32.00 | <0.000001 |
| 1/4 body length cut - secondary side | 0.002898  | 29.00          | 2.000          | 27.00      | 8.372            | 3.225   | 32.00 | 0.001951  |
| midway cut - primary half            | 0.122455  | 3.400          | 16.00          | -12.60     | 7.942            | 1.587   | 32.00 | 0.061840  |
| midway cut - secondary half          | <0.000001 | 96.80          | 16.00          | 80.80      | 7.942            | 10.17   | 32.00 | <0.000001 |

878

879

## 880 References

- 881 Adell, T., Cebria, F., & Salo, E. (2010). Gradients in planarian regeneration and homeostasis. *Cold Spring*  
882 *Harb Perspect Biol*, 2(1), a000505. doi:10.1101/cshperspect.a000505
- 883 Adler, C. E., Seidel, C. W., McKinney, S. A., & Sanchez Alvarado, A. (2014). Selective amputation of the  
884 pharynx identifies a FoxA-dependent regeneration program in planaria. *Elife*, 3, e02238.  
885 doi:10.7554/eLife.02238
- 886 Azimzadeh, J., & Basquin, C. (2016). Basal bodies across eukaryotes series: basal bodies in the  
887 freshwater planarian *Schmidtea mediterranea*. *Cilia*, 5, 15. doi:10.1186/s13630-016-0037-1
- 888 Azimzadeh, J., Wong, M. L., Downhour, D. M., Sanchez Alvarado, A., & Marshall, W. F. (2012).  
889 Centrosome loss in the evolution of planarians. *Science*, 335(6067), 461-463.  
890 doi:10.1126/science.1214457
- 891 Boisvieux-Ulrich, E., Sandoz, D., & Allart, J.-P. (1991). Determination of ciliary polarity precedes  
892 differentiation in the epithelial cells of quail oviduct. *Biology of the Cell*, 72(1-2), 3-14.
- 893 Brooks, E. R., & Wallingford, J. B. (2014). Multiciliated cells. *Curr Biol*, 24(19), R973-982.  
894 doi:10.1016/j.cub.2014.08.047
- 895 Chien, Y.-H., Werner, M. E., Stubbs, J., Joens, M. S., Li, J., Chien, S., . . . Kintner, C. (2013). Bbof1 is  
896 required to maintain cilia orientation. *Development*, 140(16), 3468. doi:10.1242/dev.096727
- 897 Chien, Y. H., Srinivasan, S., Keller, R., & Kintner, C. (2018). Mechanical Strain Determines Cilia Length,  
898 Motility, and Planar Position in the Left-Right Organizer. *Dev Cell*, 45(3), 316-330 e314.  
899 doi:10.1016/j.devcel.2018.04.007
- 900 Currie, K. W., & Pearson, B. J. (2013). Transcription factors *lhx1/5-1* and *pitx* are required for the  
901 maintenance and regeneration of serotonergic neurons in planarians. *Development*, 140(17),  
902 3577-3588. doi:10.1242/dev.098590
- 903 Davey, C. F., & Moens, C. B. (2017). Planar cell polarity in moving cells: think globally, act locally.  
904 *Development*, 144(2), 187. doi:10.1242/dev.122804
- 905 Delhaas, T., Decaluwe, W., Rubbens, M., Kerckhoffs, R., & Arts, T. (2004). Cardiac fiber orientation and  
906 the left-right asymmetry determining mechanism. *Annals of the New York Academy of Sciences*,  
907 1015, 190-201.
- 908 Devenport, D. (2014). The cell biology of planar cell polarity. *The Journal of Cell Biology*, 207(2), 171.  
909 doi:10.1083/jcb.201408039
- 910 Durant, F., Morokuma, J., Fields, C., Williams, K., Adams, D. S., & Levin, M. (2017). Long-Term, Stochastic  
911 Editing of Regenerative Anatomy via Targeting Endogenous Bioelectric Gradients. *Biophys J*,  
912 112(10), 2231-2243. doi:10.1016/j.bpj.2017.04.011
- 913 Fields, C., Bischof, J., & Levin, M. (2019). Morphological coordination: A common ancestral function  
914 unifying neural and non-neural signaling. *Physiology, in print*.
- 915 Goodrich, L. V. (2008). The plane facts of PCP in the CNS. *Neuron*, 60(1), 9-16.  
916 doi:10.1016/j.neuron.2008.09.003
- 917 Herrera-Rincon, C., Pai, V. P., Moran, K. M., Lemire, J. M., & Levin, M. (2017). The brain is required for  
918 normal muscle and nerve patterning during early *Xenopus* development. *Nat Commun*, 8(1),  
919 587. doi:10.1038/s41467-017-00597-2
- 920 Iwadate, Y., & Suzuki, T. (2004). Ciliary reorientation is evoked by a rise in calcium level over the entire  
921 cilium. *Cell Motility and the Cytoskeleton*, 57(4), 197-206. doi:10.1002/cm.10165
- 922 King, S. M., & Patel-King, R. S. (2016). Planaria as a Model System for the Analysis of Ciliary Assembly and  
923 Motility. *Methods Mol Biol*, 1454, 245-254. doi:10.1007/978-1-4939-3789-9\_16
- 924 Klagges, B. R. E., Heimbeck, G., Godenschwege, T. A., Hofbauer, A., Pflugfelder, G. O., Reifegerste, R., . . .  
925 Buchner, E. (1996). Invertebrate Synapsins: A Single Gene Codes for Several Isoforms in

- 926 *Drosophila*. *The Journal of Neuroscience*, 16(10), 3154-3165. doi:10.1523/jneurosci.16-10-  
927 03154.1996
- 928 Konishi, S., Gotoh, S., Tateishi, K., Yamamoto, Y., Korogi, Y., Nagasaki, T., . . . Mishima, M. (2016).  
929 Directed Induction of Functional Multi-ciliated Cells in Proximal Airway Epithelial Spheroids from  
930 Human Pluripotent Stem Cells. *Stem Cell Reports*, 6(1), 18-25. doi:10.1016/j.stemcr.2015.11.010
- 931 Kunimoto, K., Yamazaki, Y., Nishida, T., Shinohara, K., Ishikawa, H., Hasegawa, T., . . . Tsukita, S. (2012).  
932 Coordinated ciliary beating requires Odf2-mediated polarization of basal bodies via basal feet.  
933 *Cell*, 148(1-2), 189-200. doi:10.1016/j.cell.2011.10.052
- 934 Lee, M., & Vasioukhin, V. (2008). Cell polarity and cancer--cell and tissue polarity as a non-canonical  
935 tumor suppressor. *J Cell Sci*, 121(Pt 8), 1141-1150. doi:10.1242/jcs.016634
- 936 Marshall, W. F., & Kintner, C. (2008). Cilia orientation and the fluid mechanics of development. *Curr Opin*  
937 *Cell Biol*, 20(1), 48-52. doi:10.1016/j.ceb.2007.11.009
- 938 Marz, M., Seebeck, F., & Bartscherer, K. (2013). A Pitx transcription factor controls the establishment  
939 and maintenance of the serotonergic lineage in planarians. *Development*, 140(22), 4499-4509.  
940 doi:10.1242/dev.100081
- 941 Meunier, A., & Azimzadeh, J. (2016). Multiciliated Cells in Animals. *Cold Spring Harbor perspectives in*  
942 *biology*, 8(12), a028233. doi:10.1101/cshperspect.a028233
- 943 Mitchell, B., Jacobs, R., Li, J., Chien, S., & Kintner, C. (2007). A positive feedback mechanism governs the  
944 polarity and motion of motile cilia. *Nature*, 447(7140), 97-101. doi:10.1038/nature05771
- 945 Morgan, T. H. (1901). *Regeneration*. New York: Macmillan.
- 946 Noguchi, M., Kitani, T., Ogawa, T., Inoue, H., & Kamachi, H. (2005). Augmented ciliary reorientation  
947 response and cAMP-dependent protein phosphorylation induced by glycerol in triton-extracted  
948 *Paramecium*. *Zoolog Sci*, 22(1), 41-48. doi:10.2108/zsj.22.41
- 949 Ohata, S., & Alvarez-Buylla, A. (2016). Planar Organization of Multiciliated Ependymal (E1) Cells in the  
950 Brain Ventricular Epithelium. *Trends Neurosci*, 39(8), 543-551. doi:10.1016/j.tins.2016.05.004
- 951 Oviedo, N. J., Morokuma, J., Walentek, P., Kema, I. P., Gu, M. B., Ahn, J. M., . . . Levin, M. (2010). Long-  
952 range neural and gap junction protein-mediated cues control polarity during planarian  
953 regeneration. *Dev Biol*, 339(1), 188-199. doi:10.1016/j.ydbio.2009.12.012
- 954 Oviedo, N. J., Nicolas, C. L., Adams, D. S., & Levin, M. (2008). Establishing and maintaining a colony of  
955 planarians. *CSH Protoc*, 2008, pdb prot5053. doi:10.1101/pdb.prot5053
- 956 Pan, J., You, Y., Huang, T., & Brody, S. L. (2007). RhoA-mediated apical actin enrichment is required for  
957 ciliogenesis and promoted by Foxj1. *J Cell Sci*, 120(Pt 11), 1868-1876. doi:10.1242/jcs.005306
- 958 Panizzi, J. R., Jessen, J. R., Drummond, I. A., & Solnica-Krezel, L. (2007). New functions for a vertebrate  
959 Rho guanine nucleotide exchange factor in ciliated epithelia. *Development*, 134(5), 921.  
960 doi:10.1242/dev.02776
- 961 Pearl, R. (1903). The movements and reactions of fresh-water planarians: a study in animal behaviour.  
962 *Journal of Cell Science*, 46.
- 963 Petersen, C. P., & Reddien, P. W. (2008). Smed-betacatenin-1 is required for anteroposterior blastema  
964 polarity in planarian regeneration. *Science*, 319(5861), 327-330. doi:10.1126/science.1149943
- 965 Petersen, C. P., & Reddien, P. W. (2011). Polarized activation of notum at wounds inhibits Wnt Function  
966 to Promote Planarian Head Regeneration. *Science*, 332.
- 967 Pietak, A., Bischof, J., LaPalme, J., Morokuma, J., & Levin, M. (2019). Neural control of body-plan axis in  
968 regenerating planaria. *PLoS Comput Biol*, 15(4), e1006904. doi:10.1371/journal.pcbi.1006904
- 969 Reddien, P. W. (2018). The Cellular and Molecular Basis for Planarian Regeneration. *Cell*, 175(2), 327-  
970 345. doi:10.1016/j.cell.2018.09.021
- 971 Reddien, P. W., & Sanchez Alvarado, A. (2004). Fundamentals of planarian regeneration. *Annu Rev Cell*  
972 *Dev Biol*, 20, 725-757. doi:10.1146/annurev.cellbio.20.010403.095114

- 973 Rompolas, P., Azimzadeh, J., Marshall, W. F., & King, S. M. (2013). Analysis of ciliary assembly and  
974 function in planaria. *Methods Enzymol*, 525, 245-264. doi:10.1016/B978-0-12-397944-5.00012-2
- 975 Rompolas, P., Patel-King, R. S., & King, S. M. (2010). An outer arm Dynein conformational switch is  
976 required for metachronal synchrony of motile cilia in planaria. *Mol Biol Cell*, 21(21), 3669-3679.  
977 doi:10.1091/mbc.E10-04-0373
- 978 Rueden, C. T., Schindelin, J., Hiner, M. C., DeZonia, B. E., Walter, A. E., Arena, E. T., & Eliceiri, K. W.  
979 (2017). ImageJ2: ImageJ for the next generation of scientific image data. *BMC Bioinformatics*,  
980 18(1), 529. doi:10.1186/s12859-017-1934-z
- 981 Rustia, C. P. (1925). The control of biaxial development in the reconstitution of pieces of Planaria.  
982 *Journal of Experimental Zoology*, 42(1), 111-142. doi:DOI 10.1002/jez.1400420106
- 983 Schindelin, J., Arganda-Carreras, I., Frise, E., Kaynig, V., Longair, M., Pietzsch, T., . . . Cardona, A. (2012).  
984 Fiji: an open-source platform for biological-image analysis. *Nat Methods*, 9(7), 676-682.  
985 doi:10.1038/nmeth.2019
- 986 Schliwa, M. (1982). Action of cytochalasin D on cytoskeletal networks. *The Journal of Cell Biology*, 92, 79-  
987 91.
- 988 Spassky, N., & Meunier, A. (2017). The development and functions of multiciliated epithelia. *Nature*  
989 *Reviews Molecular Cell Biology*, 18, 423. doi:10.1038/nrm.2017.21
- 990 Stevenson, C. G., & Beane, W. S. (2010). A low percent ethanol method for immobilizing planarians. *PLoS*  
991 *One*, 5(12), e15310. doi:10.1371/journal.pone.0015310
- 992 Thielicke, W., & Stamhuis, E. J. (2014). PIVlab – Towards User-friendly, Affordable and Accurate Digital  
993 Particle Image Velocimetry in MATLAB. *Journal of Open Research Software*, 2.  
994 doi:10.5334/jors.bl
- 995 Thielicke, W., & Stamhuis, E. J. (2019). *PIVlab - Time-Resolved Digital Particle Image Velocimetry Tool for*  
996 *MATLAB*.
- 997 Tissir, F., & Goffinet, A. M. (2010). Planar cell polarity signaling in neural development. *Curr Opin*  
998 *Neurobiol*, 20(5), 572-577. doi:10.1016/j.conb.2010.05.006
- 999 Tung, T.-C., & Yeh-Tung, Y. (1940). *Experimental studies on the determination of polarity of ciliary action*  
1000 *of anuran embryos*: H. Vaillant-Carmanne.
- 1001 Twitty. (1928). Experimental studies on the ciliary action of amphibian embryos. *Journal of Experimental*  
1002 *Zoology*, 50(3), 319-344.
- 1003 Veraszto, C., Ueda, N., Bezares-Calderon, L. A., Panzera, A., Williams, E. A., Shahidi, R., & Jekely, G.  
1004 (2017). Ciliomotor circuitry underlying whole-body coordination of ciliary activity in the  
1005 Platynereis larva. *Elife*, 6. doi:10.7554/eLife.26000
- 1006 Vu, H. T.-K., Mansour, S., Kuecken, M., Blasse, C., Basquin, C., Azimzadeh, J., . . . Rink, J. C. (2018). Multi-  
1007 scale coordination of planar cell polarity in planarians. *bioRxiv*. doi:10.1101/324822
- 1008 Wagner, D. E., Wang, I. E., & Reddien, P. W. (2011). Clonogenic Neoblasts Are Pluripotent Adult Stem  
1009 Cells That Underlie Planarian Regeneration. *Science*, 332(6031), 811-816.  
1010 doi:10.1126/science.1203983
- 1011 Wallingford, J. B. (2010). Planar cell polarity signaling, cilia and polarized ciliary beating. *Curr Opin Cell*  
1012 *Biol*, 22(5), 597-604. doi:10.1016/j.ceb.2010.07.011
- 1013 Wallingford, J. B. (2012). Planar cell polarity and the developmental control of cell behavior in vertebrate  
1014 embryos. *Annu Rev Cell Dev Biol*, 28, 627-653. doi:10.1146/annurev-cellbio-092910-154208
- 1015 Werner, M. E., Hwang, P., Huisman, F., Taborak, P., Yu, C. C., & Mitchell, B. J. (2011). Actin and  
1016 microtubules drive differential aspects of planar cell polarity in multiciliated cells. *J Cell Biol*,  
1017 195(1), 19-26. doi:10.1083/jcb.201106110
- 1018 Werner, M. E., & Mitchell, B. J. (2012a). Planar cell polarity: microtubules make the connection with cilia.  
1019 *Curr Biol*, 22(23), R1001-1004. doi:10.1016/j.cub.2012.10.030

- 1020 Werner, M. E., & Mitchell, B. J. (2012b). Understanding ciliated epithelia: the power of *Xenopus*.  
1021 *Genesis*, 50(3), 176-185. doi:10.1002/dvg.20824  
1022 Witchley, J. N., Mayer, M., Wagner, D. E., Owen, J. H., & Reddien, P. W. (2013). Muscle cells provide  
1023 instructions for planarian regeneration. *Cell Rep*, 4(4), 633-641.  
1024 doi:10.1016/j.celrep.2013.07.022  
1025
